# Supplementary material
Source: PubMed Central journal article supplement (PMC10711743)

**Note to readers with disabilities:** *EHP* strives to ensure that all journal content is accessible to all readers. However, some figures and Supplemental Material published in *EHP* articles may not conform to [508 standards](#) due to the complexity of the information being presented. If you need assistance accessing journal content, please contact [ehp508@niehs.nih.gov](mailto:ehp508@niehs.nih.gov). Our staff will work with you to assess and meet your accessibility needs within 3 working days.

### **Supplemental Material**

#### **Short-Term Exposure to Ambient Air Pollution and Influenza: A Multicity Study in China**

Lin-Jie Yu, Xin-Lou Li, Yan-He Wang, Hai-Yang Zhang, Shi-Man Ruan, Bao-Gui Jiang, Qiang Xu, Yan-Song Sun, Li-Ping Wang, Wei Liu, Yang Yang, and Li-Qun Fang

#### **Table of Contents**

**Table S1.** Distribution of daily average temperature and relative humidity in 82 cities in China, 2015–2019.

**Table S2.** Distribution of daily average concentrations of PM<sub>2.5</sub> and PM<sub>10</sub> in 82 cities in China, 2015–2019.

**Table S3.** Distribution of daily average concentrations of NO<sub>2</sub> and SO<sub>2</sub> in 82 cities in China, 2015–2019.

**Table S4.** Distribution of daily average concentrations of CO and O<sub>3</sub> in 82 cities in China, 2015–2019.

**Table S5.** Detailed information of data sources used in this study on the association between influenza and air pollution in 82 cities in China, 2015–2019.

**Table S6.** Data summary of the distribution of daily incidence and distribution of variance/mean ratio for daily counts of influenza case in the 82 Chinese cities.

**Table S7.** Pearson correlation coefficients and p values between daily influenza incidence and air pollutants concentrations.

**Table S8.** Pooled estimates of lag-specific risk ratios and 95% confidence intervals for influenza per 10µg/m<sup>3</sup> increase in the concentration of each air pollutant based on the single-pollutant models.

**Table S9.** City-specific attributable fractions of the air pollutants on influenza based on the single-pollutant model, China 2015–2019.

**Table S10.** City-specific attributable fractions of the air pollutants on influenza based on the multi-pollutant model, China 2015–2019.

**Table S11.** Heterogeneity of the air pollutant effects on influenza incidence across the 82 Chinese cities and how much heterogeneity remains after city-specific characteristics are accounted for, based on the second-stage random effect meta-regression following the first-stage single-pollutant models.

**Table S12.** Median (IQR) of Bayesian information criterion (BIC) values for the linear and nonlinear air pollutant effect models across the 82 Chinese cities.

**Table S13.** Pooled estimates (95% CI) of cumulative risk ratios (CRR) per  $10\mu\text{g}/\text{m}^3$  increase in daily concentrations of the six air pollutants over the lags of 1–7 days in the sensitivity analyses.

**Figure S1.** Time series of daily influenza incidence and air pollutant level averaged over 2015–2019. The red lines represented the median of daily influenza incidence and concentrations of air pollutants and the black lines (top and bottom) represented the IQR (25%, 75%) across the 82 selected cities.

**Figure S2.** Distribution of daily incidence (A) and distribution of variance/mean ratio for daily counts of influenza cases (B) in the 82 Chinese cities.

**Figure S3.** Spatial distribution of city-level annual influenza incidence among (A) children (0–14 years old) and (B) adults ( $\geq 15$  years old) in the mainland of China from 2015 to 2019.

**Figure S4.** Annual median concentrations of air pollutants in the 82 Chinese cities selected for the primary analysis.

**Figure S5.** Pooled estimates of lag-specific risk ratios and 95% confidence intervals per  $10\mu\text{g}/\text{m}^3$  increase in the concentration of each air pollutant based on the single-pollutant models. Natural cubic spline with 3 degrees of freedom was used to model the variation of the linear effect over the lags.

**Figure S6.** Forest plots for the attributable fractions (and 95% confidence intervals) of influenza incidence associated with air pollutant concentrations, using single-pollutant models.

**Figure S7.** Forest plots for the attributable fractions (and 95% confidence intervals) of influenza incidence associated with air pollutant concentrations, using the multi-pollutant model.

**Figure S8.** Correlation between daily concentrations of the six air pollutants during 2015–2019 in the 82 Chinese cities.

**Additional File-** Excel Document & R code

## Tables

Table S1. Distribution of daily average temperature and relative humidity in 82 cities in China, 2015–2019.

| City         | Temperature (°C) |       |      |      |      |      | Relative humidity (%) |      |      |      |      |      |
|--------------|------------------|-------|------|------|------|------|-----------------------|------|------|------|------|------|
|              | Mean             | Q0    | Q25  | Q50  | Q75  | Q100 | Mean                  | Q0   | Q25  | Q50  | Q75  | Q100 |
| Beijing      | 10.6             | -21.1 | -1.1 | 12.1 | 21.6 | 30.3 | 54.7                  | 12.2 | 40.4 | 54.0 | 69.4 | 96.0 |
| Tianjin      | 12.5             | -18.4 | 1.2  | 13.9 | 23.3 | 32.1 | 57.4                  | 16.2 | 43.7 | 57.1 | 71.9 | 95.0 |
| Shijiazhuang | 11.8             | -16.5 | 1.5  | 13.2 | 21.8 | 30.1 | 56.9                  | 15.4 | 42.4 | 56.2 | 71.7 | 95.8 |
| Handan       | 13.8             | -12.1 | 4.1  | 15.1 | 23.4 | 31.3 | 59.9                  | 17.3 | 46.3 | 60.0 | 74.3 | 96.5 |
| Xingtai      | 13.4             | -13.8 | 3.3  | 14.7 | 23.3 | 31.0 | 59.1                  | 18.4 | 45.1 | 59.1 | 73.6 | 96.6 |
| Baoding      | 11.4             | -18.7 | 0.4  | 12.9 | 21.8 | 30.3 | 56.3                  | 14.8 | 41.8 | 55.5 | 71.1 | 95.9 |
| Zhangjiakou  | 7.9              | -23.9 | -3.8 | 9.3  | 19.1 | 28.6 | 52.4                  | 12.2 | 40.5 | 51.9 | 64.6 | 92.0 |
| Cangzhou     | 13.5             | -16.0 | 2.6  | 14.8 | 23.7 | 32.6 | 59.4                  | 18.5 | 46.3 | 59.4 | 73.6 | 96.1 |
| Hengshui     | 13.5             | -15.0 | 2.9  | 14.8 | 23.6 | 31.9 | 60.2                  | 18.9 | 46.7 | 60.7 | 74.5 | 97.3 |
| Datong       | 8.1              | -21.9 | -2.7 | 9.8  | 18.8 | 28.2 | 52.7                  | 14.0 | 39.5 | 52.2 | 65.6 | 94.2 |
| Jincheng     | 13.3             | -10.6 | 4.1  | 14.4 | 22.3 | 30.3 | 60.2                  | 16.0 | 47.1 | 61.2 | 73.9 | 97.5 |
| Linfen       | 12.3             | -13.3 | 2.8  | 13.4 | 21.5 | 30.8 | 57.6                  | 15.0 | 44.7 | 57.9 | 71.0 | 97.0 |
| Shanghai     | 17.0             | -6.1  | 9.5  | 17.9 | 23.9 | 33.7 | 76.7                  | 39.9 | 69.8 | 78.0 | 84.8 | 98.8 |
| Nanjing      | 16.6             | -7.5  | 8.4  | 17.4 | 24.1 | 34.3 | 75.3                  | 38.9 | 67.9 | 76.6 | 84.3 | 98.0 |
| Wuxi         | 16.9             | -6.8  | 8.9  | 17.6 | 24.2 | 34.7 | 75.8                  | 38.7 | 68.6 | 77.0 | 84.5 | 99.1 |
| Hangzhou     | 17.6             | -5.3  | 10.0 | 18.4 | 24.5 | 33.7 | 76.7                  | 40.7 | 69.1 | 78.0 | 85.5 | 98.3 |
| Ningbo       | 17.7             | -4.2  | 10.7 | 18.5 | 24.1 | 32.8 | 78.2                  | 37.8 | 71.9 | 79.6 | 85.8 | 99.1 |
| Shaoxing     | 17.8             | -4.5  | 10.6 | 18.6 | 24.5 | 33.8 | 77.2                  | 37.4 | 69.9 | 78.8 | 85.5 | 99.0 |
| Jinhua       | 18.2             | -3.8  | 10.9 | 19.0 | 24.8 | 33.5 | 76.2                  | 36.3 | 68.0 | 77.4 | 85.5 | 99.4 |
| Taizhou      | 18.2             | -2.8  | 11.3 | 19.0 | 24.7 | 32.0 | 78.3                  | 36.7 | 71.9 | 79.6 | 86.2 | 98.8 |
| Lishui       | 18.7             | -2.2  | 11.8 | 19.6 | 25.2 | 32.1 | 77.1                  | 41.3 | 69.6 | 78.1 | 85.7 | 98.3 |
| Hefei        | 16.5             | -7.1  | 8.3  | 17.3 | 24.3 | 33.9 | 76.2                  | 39.1 | 69.1 | 77.3 | 84.7 | 98.4 |
| Maanshan     | 16.6             | -7.3  | 8.4  | 17.4 | 24.1 | 33.8 | 75.7                  | 39.6 | 68.4 | 76.9 | 84.7 | 98.4 |
| Huangshan    | 16.9             | -5.9  | 9.3  | 17.9 | 23.8 | 32.3 | 76.9                  | 37.5 | 69.2 | 78.2 | 85.9 | 99.5 |
| Chuzhou      | 16.2             | -8.2  | 7.8  | 17.1 | 24.2 | 33.9 | 75.0                  | 34.6 | 67.5 | 76.4 | 84.0 | 98.2 |
| Fuyang       | 16.1             | -7.3  | 7.4  | 16.9 | 24.4 | 33.2 | 72.9                  | 26.4 | 64.2 | 74.6 | 82.5 | 97.5 |
| Luan         | 16.5             | -6.5  | 8.2  | 17.4 | 24.3 | 33.8 | 76.1                  | 36.9 | 68.6 | 77.2 | 84.8 | 97.9 |
| Chizhou      | 16.9             | -6.0  | 9.2  | 17.9 | 24.2 | 32.5 | 77.5                  | 41.2 | 70.8 | 78.7 | 85.4 | 98.7 |
| Fuzhou       | 19.8             | 0.8   | 13.9 | 20.5 | 25.9 | 30.5 | 78.4                  | 35.6 | 72.4 | 79.4 | 86.2 | 98.2 |
| Quanzhou     | 20.1             | 1.4   | 14.7 | 20.9 | 25.8 | 30.2 | 79.8                  | 45.2 | 74.3 | 81.2 | 86.9 | 98.6 |
| Nanchang     | 18.1             | -2.9  | 10.7 | 19.1 | 25.2 | 32.5 | 76.8                  | 35.3 | 69.1 | 78.2 | 85.1 | 97.7 |
| Yingtian     | 18.5             | -2.8  | 11.3 | 19.6 | 25.3 | 32.5 | 78.0                  | 37.9 | 70.0 | 79.0 | 86.9 | 99.2 |
| Ganzhou      | 19.7             | -0.1  | 13.4 | 21.1 | 26.5 | 31.1 | 78.6                  | 38.2 | 72.5 | 79.8 | 86.2 | 99.4 |
| Jian         | 18.8             | -1.3  | 11.8 | 20.0 | 25.8 | 31.9 | 78.7                  | 41.7 | 71.6 | 80.1 | 86.7 | 98.0 |
| Shangrao     | 18.1             | -3.5  | 10.8 | 19.1 | 25.1 | 32.5 | 77.5                  | 37.1 | 69.7 | 78.5 | 86.2 | 98.9 |
| Dezhou       | 13.9             | -13.5 | 3.6  | 15.2 | 23.7 | 31.9 | 61.5                  | 19.8 | 48.8 | 62.0 | 75.2 | 97.5 |
| Liaocheng    | 14.1             | -11.7 | 4.3  | 15.5 | 23.7 | 32.0 | 62.5                  | 19.3 | 49.9 | 62.8 | 75.7 | 97.7 |
| Heze         | 14.9             | -9.8  | 5.5  | 16.0 | 24.0 | 32.4 | 66.3                  | 18.8 | 55.6 | 67.4 | 78.5 | 97.1 |
| Luoyang      | 14.5             | -8.2  | 5.9  | 15.4 | 23.2 | 31.6 | 63.3                  | 18.7 | 51.4 | 65.0 | 76.4 | 97.2 |
| Pingdingshan | 15.2             | -6.9  | 6.5  | 16.1 | 23.9 | 32.5 | 66.0                  | 19.6 | 55.3 | 67.4 | 78.4 | 98.0 |
| Anyang       | 14.3             | -10.4 | 4.8  | 15.7 | 23.7 | 31.8 | 61.2                  | 16.4 | 48.4 | 61.3 | 75.3 | 97.1 |

Table S1. (continued).

| City      | Temperature (°C) |       |      |      |      |      | Relative humidity (%) |      |      |      |      |      |
|-----------|------------------|-------|------|------|------|------|-----------------------|------|------|------|------|------|
|           | Mean             | Q0    | Q25  | Q50  | Q75  | Q100 | Mean                  | Q0   | Q25  | Q50  | Q75  | Q100 |
| Xinxiang  | 14.6             | -8.9  | 5.5  | 15.9 | 23.9 | 32.2 | 62.3                  | 16.2 | 50.7 | 62.8 | 75.7 | 97.2 |
| Nanyang   | 15.6             | -6.2  | 7.2  | 16.6 | 24.0 | 32.5 | 68.1                  | 18.5 | 58.3 | 69.7 | 78.8 | 97.9 |
| Shangqiu  | 15.3             | -8.9  | 6.2  | 16.3 | 24.2 | 32.5 | 69.2                  | 20.2 | 59.8 | 70.8 | 80.2 | 96.4 |
| Xinyang   | 16.5             | -5.6  | 8.1  | 17.3 | 24.6 | 33.4 | 73.5                  | 31.7 | 64.9 | 75.0 | 82.9 | 97.8 |
| Zhoukou   | 15.7             | -7.5  | 6.8  | 16.6 | 24.5 | 32.8 | 68.9                  | 20.8 | 59.3 | 70.4 | 80.0 | 96.6 |
| Zhumadian | 16.0             | -6.0  | 7.4  | 17.0 | 24.6 | 33.1 | 70.3                  | 25.3 | 60.5 | 71.9 | 80.9 | 97.8 |
| Wuhan     | 17.2             | -3.5  | 9.2  | 18.3 | 24.9 | 33.7 | 75.5                  | 35.0 | 68.2 | 76.6 | 84.1 | 98.8 |
| Jingzhou  | 17.5             | -3.4  | 9.8  | 18.4 | 25.1 | 33.9 | 77.1                  | 36.8 | 70.4 | 78.1 | 85.2 | 99.4 |
| Huanggang | 17.0             | -4.6  | 9.1  | 17.9 | 24.7 | 33.5 | 75.5                  | 35.5 | 67.8 | 76.9 | 84.2 | 98.2 |
| Enshi     | 16.6             | -3.8  | 9.2  | 17.3 | 23.8 | 31.1 | 77.7                  | 44.6 | 71.8 | 77.9 | 84.5 | 96.4 |
| Changsha  | 18.0             | -1.4  | 10.5 | 18.8 | 25.2 | 32.7 | 78.7                  | 39.0 | 72.1 | 79.8 | 86.4 | 99.2 |
| Zhuzhou   | 18.3             | -1.0  | 11.2 | 19.4 | 25.4 | 31.9 | 78.7                  | 42.8 | 72.2 | 80.2 | 86.3 | 98.3 |
| Shaoyang  | 18.0             | -0.8  | 10.8 | 19.0 | 25.1 | 31.9 | 79.0                  | 29.8 | 72.4 | 80.0 | 86.2 | 98.9 |
| Yueyang   | 17.9             | -2.1  | 10.2 | 18.6 | 25.2 | 33.5 | 78.1                  | 38.4 | 71.0 | 79.0 | 86.1 | 99.5 |
| Chenzhou  | 18.9             | 0.1   | 12.5 | 20.2 | 25.9 | 31.4 | 79.2                  | 44.1 | 73.2 | 80.7 | 86.7 | 99.0 |
| Yongzhou  | 19.0             | -0.1  | 12.2 | 20.3 | 26.1 | 31.6 | 78.4                  | 39.6 | 71.5 | 80.1 | 86.4 | 99.6 |
| Huaihua   | 17.6             | -1.4  | 10.3 | 18.4 | 24.5 | 31.8 | 79.7                  | 34.0 | 73.6 | 81.0 | 86.6 | 98.4 |
| Loudi     | 17.7             | -1.5  | 10.4 | 18.6 | 24.9 | 32.5 | 78.7                  | 35.2 | 72.2 | 80.1 | 85.7 | 98.6 |
| Guangzhou | 22.0             | 3.1   | 17.1 | 23.3 | 27.4 | 31.7 | 79.6                  | 26.5 | 74.6 | 81.3 | 86.6 | 98.9 |
| Shaoguan  | 20.2             | 1.6   | 14.3 | 21.6 | 26.6 | 31.2 | 79.4                  | 32.8 | 74.3 | 80.6 | 86.2 | 98.7 |
| Shenzhen  | 22.8             | 3.9   | 18.4 | 24.1 | 27.7 | 32.2 | 78.6                  | 28.9 | 73.9 | 80.5 | 85.8 | 98.2 |
| Zhuhai    | 23.2             | 4.2   | 19.0 | 24.5 | 28.0 | 32.3 | 79.4                  | 28.3 | 74.6 | 81.2 | 86.7 | 98.6 |
| Foshan    | 22.4             | 3.4   | 17.6 | 23.7 | 27.5 | 31.8 | 79.8                  | 28.9 | 74.8 | 81.7 | 87.0 | 99.0 |
| Jiangmen  | 23.0             | 3.9   | 18.7 | 24.4 | 27.9 | 32.1 | 80.1                  | 28.8 | 75.4 | 82.0 | 87.1 | 98.2 |
| Zhaoqing  | 21.7             | 3.0   | 16.3 | 23.0 | 27.3 | 31.6 | 80.3                  | 40.0 | 74.9 | 81.7 | 86.9 | 98.6 |
| Huizhou   | 22.2             | 3.3   | 17.4 | 23.5 | 27.4 | 31.8 | 78.7                  | 28.8 | 73.9 | 80.3 | 85.9 | 98.8 |
| Shanwei   | 22.5             | 4.2   | 18.0 | 23.7 | 27.5 | 31.6 | 79.2                  | 37.5 | 74.3 | 80.7 | 85.7 | 98.2 |
| Heyuan    | 21.3             | 2.4   | 16.1 | 22.6 | 27.0 | 31.0 | 79.0                  | 33.6 | 74.1 | 80.5 | 85.7 | 97.7 |
| Yangjiang | 23.1             | 3.9   | 18.9 | 24.6 | 27.8 | 31.8 | 81.0                  | 32.6 | 76.7 | 82.7 | 87.4 | 98.5 |
| Qingyuan  | 20.8             | 2.4   | 14.9 | 22.2 | 26.9 | 31.4 | 79.6                  | 34.3 | 74.5 | 80.9 | 86.5 | 99.1 |
| Dongguan  | 22.5             | 3.5   | 17.9 | 23.9 | 27.6 | 32.1 | 79.0                  | 27.0 | 74.2 | 80.9 | 86.3 | 98.6 |
| Zhongshan | 22.9             | 3.9   | 18.6 | 24.3 | 27.8 | 32.2 | 79.2                  | 26.9 | 74.4 | 81.2 | 86.6 | 99.0 |
| Nanning   | 21.9             | 4.0   | 16.8 | 23.3 | 27.1 | 31.8 | 79.8                  | 36.1 | 74.5 | 81.7 | 86.5 | 99.0 |
| Chongqing | 17.0             | -3.2  | 9.8  | 17.5 | 23.7 | 32.1 | 78.1                  | 49.3 | 72.3 | 78.8 | 84.9 | 95.7 |
| Chengdu   | 14.3             | -4.2  | 7.6  | 14.9 | 20.9 | 28.7 | 75.8                  | 37.9 | 69.8 | 76.4 | 82.3 | 95.5 |
| Guiyang   | 16.4             | -1.3  | 10.3 | 17.3 | 22.7 | 28.6 | 79.9                  | 45.3 | 74.6 | 81.0 | 86.4 | 98.0 |
| Kunming   | 16.4             | -3.2  | 12.5 | 17.4 | 20.8 | 26.3 | 71.1                  | 27.3 | 63.7 | 74.1 | 80.6 | 94.1 |
| Xian      | 13.6             | -9.0  | 5.1  | 14.0 | 21.7 | 31.7 | 65.8                  | 22.7 | 55.0 | 66.2 | 76.6 | 97.3 |
| Hanzhong  | 13.8             | -6.9  | 6.2  | 14.2 | 21.1 | 29.5 | 72.7                  | 27.2 | 65.4 | 73.5 | 80.8 | 96.9 |
| Tianshui  | 10.0             | -13.0 | 1.8  | 10.8 | 17.8 | 27.1 | 65.5                  | 24.1 | 55.4 | 65.8 | 75.4 | 95.2 |
| Dingxi    | 8.4              | -15.1 | 0.1  | 9.5  | 16.3 | 25.2 | 63.2                  | 25.5 | 53.5 | 63.5 | 73.2 | 94.6 |

Note: Q, quantile.

Table S2. Distribution of daily average concentrations of PM<sub>2.5</sub> and PM<sub>10</sub> in 82 cities in China, 2015–2019.

| City         | PM <sub>2.5</sub> (µg/m <sup>3</sup> ) |      |      |      |       |       | PM <sub>10</sub> (µg/m <sup>3</sup> ) |      |      |       |       |        |
|--------------|----------------------------------------|------|------|------|-------|-------|---------------------------------------|------|------|-------|-------|--------|
|              | Mean                                   | Q0   | Q25  | Q50  | Q75   | Q100  | Mean                                  | Q0   | Q25  | Q50   | Q75   | Q100   |
| Beijing      | 60.1                                   | 3.0  | 23.0 | 45.0 | 78.8  | 478.0 | 90.6                                  | 10.0 | 47.0 | 73.0  | 114.0 | 941.0  |
| Tianjin      | 60.5                                   | 6.0  | 30.0 | 48.0 | 75.0  | 339.0 | 100.0                                 | 10.0 | 58.0 | 82.0  | 124.0 | 929.0  |
| Shijiazhuang | 82.1                                   | 6.0  | 37.0 | 59.0 | 100.0 | 627.0 | 144.7                                 | 17.0 | 80.0 | 120.0 | 181.3 | 853.0  |
| Handan       | 78.5                                   | 8.0  | 40.0 | 62.0 | 94.0  | 697.0 | 147.2                                 | 20.0 | 89.0 | 124.0 | 179.0 | 876.0  |
| Xingtai      | 80.3                                   | 9.0  | 39.0 | 61.0 | 99.0  | 569.0 | 144.2                                 | 17.0 | 84.0 | 124.0 | 179.0 | 693.0  |
| Baoding      | 81.7                                   | 9.0  | 38.0 | 60.0 | 103.0 | 568.0 | 135.8                                 | 15.0 | 71.0 | 111.0 | 171.0 | 996.0  |
| Zhangjiakou  | 31.0                                   | 6.0  | 16.0 | 25.0 | 38.0  | 283.0 | 79.3                                  | 7.0  | 44.0 | 62.0  | 96.0  | 1552.0 |
| Cangzhou     | 62.5                                   | 7.0  | 34.0 | 49.0 | 76.0  | 387.0 | 106.6                                 | 9.0  | 63.0 | 89.0  | 132.9 | 861.0  |
| Hengshui     | 75.4                                   | 8.0  | 39.0 | 58.0 | 94.0  | 730.0 | 135.0                                 | 14.0 | 74.0 | 111.0 | 166.0 | 911.0  |
| Datong       | 36.7                                   | 5.0  | 20.0 | 31.0 | 46.0  | 418.0 | 82.3                                  | 11.0 | 49.0 | 70.0  | 103.0 | 973.0  |
| Jincheng     | 59.7                                   | 5.0  | 31.0 | 48.0 | 76.8  | 306.0 | 116.1                                 | 16.0 | 71.0 | 103.0 | 144.8 | 393.0  |
| Linfen       | 68.3                                   | 5.0  | 34.0 | 51.4 | 81.0  | 472.0 | 115.5                                 | 15.0 | 67.9 | 96.0  | 137.0 | 623.0  |
| Shanghai     | 41.4                                   | 5.0  | 22.0 | 34.0 | 53.0  | 217.0 | 59.1                                  | 9.0  | 35.0 | 50.0  | 74.6  | 249.0  |
| Nanjing      | 45.6                                   | 4.0  | 24.0 | 37.0 | 58.0  | 257.0 | 82.2                                  | 7.0  | 49.0 | 72.0  | 104.0 | 381.0  |
| Wuxi         | 48.3                                   | 6.0  | 28.0 | 41.0 | 60.0  | 235.0 | 81.0                                  | 13.0 | 51.0 | 70.0  | 101.0 | 315.0  |
| Hangzhou     | 45.6                                   | 6.0  | 27.0 | 39.0 | 57.0  | 225.0 | 74.5                                  | 8.0  | 45.0 | 66.0  | 94.0  | 299.0  |
| Ningbo       | 36.3                                   | 3.0  | 20.0 | 31.0 | 45.0  | 225.0 | 58.1                                  | 7.0  | 34.0 | 50.0  | 72.9  | 288.0  |
| Shaoxing     | 45.4                                   | 5.0  | 26.0 | 39.0 | 56.0  | 213.0 | 69.5                                  | 8.0  | 41.0 | 60.0  | 86.0  | 286.0  |
| Jinhua       | 41.5                                   | 1.0  | 24.0 | 36.0 | 53.0  | 225.0 | 62.0                                  | 4.0  | 39.0 | 55.5  | 79.0  | 262.0  |
| Taizhou      | 33.3                                   | 3.0  | 20.0 | 29.0 | 42.0  | 181.0 | 57.4                                  | 10.0 | 36.0 | 51.0  | 72.8  | 250.0  |
| Lishui       | 31.3                                   | 2.0  | 18.0 | 27.0 | 40.0  | 150.0 | 49.3                                  | 2.0  | 32.0 | 45.0  | 62.0  | 187.0  |
| Hefei        | 54.2                                   | 5.0  | 31.0 | 46.0 | 68.8  | 238.0 | 84.3                                  | 11.0 | 54.0 | 77.5  | 106.0 | 360.0  |
| Maanshan     | 49.8                                   | 6.0  | 28.0 | 42.0 | 62.8  | 241.0 | 80.0                                  | 9.0  | 50.0 | 71.0  | 99.0  | 321.0  |
| Huangshan    | 27.4                                   | 5.0  | 14.0 | 24.0 | 36.0  | 188.0 | 45.9                                  | 6.0  | 27.4 | 41.0  | 58.0  | 217.0  |
| Chuzhou      | 54.8                                   | 6.0  | 32.0 | 48.0 | 71.0  | 223.0 | 83.6                                  | 6.0  | 52.0 | 75.0  | 108.0 | 374.0  |
| Fuyang       | 56.9                                   | 4.0  | 30.0 | 46.0 | 74.0  | 341.0 | 90.6                                  | 10.0 | 55.0 | 79.0  | 113.0 | 673.0  |
| Luan         | 47.4                                   | 5.0  | 28.0 | 41.0 | 60.0  | 257.0 | 80.0                                  | 11.0 | 52.0 | 73.0  | 99.0  | 377.0  |
| Chizhou      | 43.6                                   | 4.0  | 23.0 | 35.0 | 54.0  | 288.0 | 68.1                                  | 6.0  | 37.0 | 57.0  | 85.0  | 359.0  |
| Fuzhou       | 26.5                                   | 3.0  | 17.0 | 24.0 | 33.0  | 110.0 | 50.8                                  | 8.0  | 34.0 | 47.0  | 64.0  | 188.0  |
| Quanzhou     | 27.0                                   | 4.0  | 17.0 | 24.0 | 33.0  | 205.0 | 51.1                                  | 10.0 | 34.0 | 47.0  | 63.0  | 301.0  |
| Nanchang     | 37.7                                   | 5.0  | 19.0 | 31.0 | 49.0  | 273.0 | 74.4                                  | 7.0  | 43.0 | 65.0  | 97.0  | 284.0  |
| Yingtian     | 39.3                                   | 4.0  | 23.0 | 35.0 | 50.0  | 191.0 | 58.8                                  | 6.0  | 36.0 | 52.0  | 75.0  | 234.0  |
| Ganzhou      | 40.7                                   | 7.0  | 26.0 | 36.0 | 52.0  | 197.0 | 63.6                                  | 11.0 | 40.0 | 55.0  | 80.0  | 258.0  |
| Jian         | 42.8                                   | 6.0  | 27.0 | 38.0 | 53.0  | 219.0 | 66.4                                  | 15.0 | 43.0 | 59.0  | 84.0  | 289.0  |
| Shangrao     | 39.1                                   | 5.0  | 26.0 | 36.0 | 48.0  | 262.0 | 65.1                                  | 11.0 | 42.0 | 59.0  | 82.0  | 368.0  |
| Dezhou       | 72.1                                   | 3.0  | 36.0 | 57.0 | 92.0  | 532.0 | 131.7                                 | 9.0  | 76.0 | 113.0 | 163.1 | 897.0  |
| Liaocheng    | 77.2                                   | 6.0  | 42.3 | 63.0 | 96.0  | 593.0 | 139.1                                 | 8.0  | 88.0 | 124.0 | 172.0 | 705.0  |
| Heze         | 73.1                                   | 3.0  | 39.0 | 58.0 | 92.0  | 472.0 | 133.9                                 | 6.0  | 85.0 | 117.0 | 167.8 | 675.0  |
| Luoyang      | 68.9                                   | 6.0  | 35.0 | 54.0 | 83.5  | 488.0 | 122.6                                 | 9.0  | 71.0 | 105.0 | 152.0 | 609.0  |
| Pingdingshan | 70.4                                   | 10.0 | 37.0 | 57.5 | 89.0  | 396.0 | 117.8                                 | 13.0 | 69.0 | 101.0 | 150.0 | 551.0  |
| Anyang       | 80.1                                   | 5.0  | 40.0 | 59.0 | 96.1  | 685.0 | 140.4                                 | 19.0 | 83.0 | 115.0 | 170.0 | 875.0  |

Table S2. (continued).

| City      | PM <sub>2.5</sub> (µg/m <sup>3</sup> ) |      |      |      |      |       | PM <sub>10</sub> (µg/m <sup>3</sup> ) |      |      |       |       |        |
|-----------|----------------------------------------|------|------|------|------|-------|---------------------------------------|------|------|-------|-------|--------|
|           | Mean                                   | Q0   | Q25  | Q50  | Q75  | Q100  | Mean                                  | Q0   | Q25  | Q50   | Q75   | Q100   |
| Xinxiang  | 72.3                                   | 10.0 | 37.0 | 56.0 | 89.0 | 687.0 | 127.0                                 | 16.0 | 74.0 | 108.0 | 159.8 | 928.0  |
| Nanyang   | 62.4                                   | 7.0  | 33.0 | 49.0 | 79.0 | 316.0 | 112.5                                 | 14.0 | 64.1 | 97.0  | 146.0 | 508.0  |
| Shangqiu  | 67.0                                   | 9.0  | 37.0 | 54.0 | 85.0 | 467.0 | 115.8                                 | 17.0 | 73.0 | 102.0 | 143.0 | 604.0  |
| Xinyang   | 56.7                                   | 5.0  | 30.0 | 45.0 | 73.0 | 343.0 | 94.5                                  | 12.0 | 54.0 | 81.0  | 120.0 | 461.0  |
| Zhoukou   | 65.8                                   | 6.0  | 33.0 | 51.0 | 84.0 | 549.0 | 112.6                                 | 9.0  | 67.0 | 96.0  | 142.0 | 583.0  |
| Zhumadian | 62.4                                   | 5.0  | 33.0 | 51.0 | 79.0 | 449.0 | 110.0                                 | 12.0 | 67.0 | 96.0  | 138.0 | 583.0  |
| Wuhan     | 54.4                                   | 5.0  | 30.0 | 45.0 | 69.0 | 292.0 | 89.3                                  | 9.0  | 54.0 | 80.0  | 116.0 | 614.0  |
| Jingzhou  | 54.9                                   | 9.0  | 32.0 | 46.0 | 68.0 | 255.0 | 95.0                                  | 14.0 | 58.0 | 82.0  | 119.0 | 382.0  |
| Huanggang | 47.7                                   | 2.0  | 28.0 | 41.0 | 60.0 | 289.0 | 79.3                                  | 14.0 | 52.0 | 71.0  | 98.0  | 357.0  |
| Enshi     | 43.3                                   | 8.0  | 24.0 | 34.0 | 53.0 | 249.0 | 65.8                                  | 16.0 | 40.0 | 55.0  | 80.0  | 294.0  |
| Changsha  | 51.7                                   | 3.0  | 28.0 | 43.0 | 65.0 | 277.0 | 72.5                                  | 6.0  | 44.0 | 64.0  | 93.0  | 422.0  |
| Zhuzhou   | 50.1                                   | 7.0  | 28.0 | 41.0 | 62.0 | 301.0 | 79.1                                  | 9.0  | 46.0 | 67.2  | 102.0 | 340.0  |
| Shaoyang  | 51.6                                   | 6.0  | 29.0 | 44.0 | 64.0 | 399.0 | 74.7                                  | 7.0  | 44.0 | 63.0  | 94.8  | 424.0  |
| Yueyang   | 47.5                                   | 7.0  | 30.0 | 42.0 | 58.0 | 458.0 | 75.7                                  | 12.0 | 47.0 | 67.0  | 94.0  | 596.0  |
| Chenzhou  | 37.1                                   | 6.0  | 19.0 | 31.0 | 50.0 | 210.0 | 66.3                                  | 10.0 | 41.0 | 57.0  | 83.0  | 281.0  |
| Yongzhou  | 45.4                                   | 6.0  | 26.0 | 39.0 | 57.0 | 194.0 | 67.5                                  | 10.0 | 41.0 | 60.0  | 85.0  | 274.0  |
| Huaihua   | 40.5                                   | 5.0  | 21.0 | 34.0 | 52.0 | 168.0 | 79.5                                  | 13.0 | 49.0 | 71.0  | 100.0 | 340.0  |
| Loudi     | 43.1                                   | 7.0  | 24.0 | 36.0 | 54.0 | 311.0 | 72.5                                  | 13.0 | 41.0 | 62.0  | 94.0  | 370.0  |
| Guangzhou | 35.0                                   | 5.0  | 21.0 | 30.0 | 44.8 | 154.0 | 56.7                                  | 10.0 | 37.0 | 50.0  | 71.8  | 213.0  |
| Shaoguan  | 33.9                                   | 5.0  | 21.0 | 29.0 | 43.0 | 172.0 | 50.9                                  | 6.0  | 33.0 | 46.0  | 64.0  | 216.0  |
| Shenzhen  | 26.9                                   | 5.0  | 16.0 | 24.0 | 35.0 | 102.0 | 44.5                                  | 10.0 | 28.0 | 40.0  | 57.0  | 160.0  |
| Zhuhai    | 27.7                                   | 3.0  | 14.0 | 24.0 | 36.0 | 125.0 | 44.8                                  | 7.0  | 26.0 | 40.0  | 57.0  | 160.0  |
| Foshan    | 36.3                                   | 4.0  | 21.0 | 31.0 | 45.0 | 227.0 | 59.5                                  | 8.0  | 38.0 | 52.0  | 75.0  | 276.0  |
| Jiangmen  | 32.4                                   | 4.0  | 18.0 | 27.0 | 41.0 | 154.0 | 55.6                                  | 11.0 | 34.0 | 49.0  | 70.0  | 194.0  |
| Zhaoqing  | 37.3                                   | 5.0  | 21.0 | 32.0 | 48.0 | 147.0 | 56.6                                  | 9.0  | 36.0 | 50.0  | 70.0  | 196.0  |
| Huizhou   | 27.2                                   | 5.0  | 16.0 | 24.0 | 35.0 | 141.0 | 48.9                                  | 9.0  | 33.0 | 45.0  | 61.0  | 188.0  |
| Shanwei   | 24.7                                   | 4.0  | 14.5 | 22.0 | 32.0 | 84.0  | 41.3                                  | 7.0  | 27.0 | 38.0  | 53.0  | 124.0  |
| Heyuan    | 30.0                                   | 4.0  | 19.0 | 27.0 | 39.0 | 136.0 | 47.2                                  | 7.0  | 31.2 | 44.0  | 60.0  | 202.0  |
| Yangjiang | 31.1                                   | 5.0  | 16.1 | 26.0 | 41.0 | 123.0 | 46.8                                  | 8.0  | 29.0 | 40.0  | 60.0  | 143.0  |
| Qingyuan  | 35.8                                   | 2.0  | 20.8 | 30.0 | 46.0 | 171.0 | 55.8                                  | 8.0  | 35.0 | 49.0  | 70.0  | 217.0  |
| Dongguan  | 35.3                                   | 6.0  | 21.0 | 31.0 | 45.9 | 141.0 | 51.6                                  | 8.0  | 34.0 | 46.0  | 65.0  | 168.0  |
| Zhongshan | 30.7                                   | 4.0  | 16.0 | 26.0 | 40.0 | 120.0 | 47.1                                  | 8.0  | 27.0 | 41.0  | 61.0  | 166.0  |
| Nanning   | 35.3                                   | 5.0  | 19.0 | 29.0 | 45.0 | 240.0 | 60.6                                  | 9.0  | 37.0 | 51.0  | 75.0  | 255.0  |
| Chongqing | 46.0                                   | 8.0  | 27.0 | 39.0 | 57.0 | 205.0 | 71.5                                  | 13.0 | 45.0 | 64.0  | 88.0  | 278.0  |
| Chengdu   | 55.4                                   | 5.0  | 29.0 | 45.0 | 71.0 | 329.0 | 90.5                                  | 8.0  | 50.0 | 75.0  | 116.0 | 484.0  |
| Guiyang   | 33.1                                   | 6.0  | 20.0 | 30.0 | 42.0 | 206.0 | 56.5                                  | 11.0 | 37.0 | 52.0  | 71.0  | 244.0  |
| Kunming   | 27.7                                   | 7.0  | 19.0 | 25.0 | 35.0 | 99.0  | 54.1                                  | 14.0 | 37.0 | 50.0  | 68.0  | 175.0  |
| Xian      | 64.7                                   | 6.0  | 30.0 | 46.0 | 76.0 | 499.0 | 123.5                                 | 11.0 | 68.1 | 99.0  | 153.0 | 605.0  |
| Hanzhong  | 52.0                                   | 3.0  | 25.0 | 39.0 | 65.0 | 283.0 | 82.3                                  | 9.0  | 47.0 | 68.0  | 105.0 | 381.0  |
| Tianshui  | 39.4                                   | 4.0  | 20.0 | 31.0 | 50.0 | 216.0 | 79.5                                  | 9.0  | 42.0 | 64.0  | 103.0 | 740.0  |
| Dingxi    | 37.0                                   | 5.0  | 21.0 | 30.0 | 48.0 | 240.0 | 81.7                                  | 8.0  | 44.6 | 65.0  | 101.0 | 1060.0 |

Note: PM, particulate matter; Q, quantile.

Table S3. Distribution of daily average concentrations of NO<sub>2</sub> and SO<sub>2</sub> in 82 cities in China, 2015–2019.

| City         | NO <sub>2</sub> (µg/m <sup>3</sup> ) |      |      |      |      |       | SO <sub>2</sub> (µg/m <sup>3</sup> ) |     |      |      |      |       |
|--------------|--------------------------------------|------|------|------|------|-------|--------------------------------------|-----|------|------|------|-------|
|              | Mean                                 | Q0   | Q25  | Q50  | Q75  | Q100  | Mean                                 | Q0  | Q25  | Q50  | Q75  | Q100  |
| Beijing      | 44.3                                 | 7.0  | 29.0 | 39.0 | 54.0 | 154.0 | 8.3                                  | 2.0 | 3.0  | 5.0  | 10.0 | 85.0  |
| Tianjin      | 45.8                                 | 9.0  | 30.0 | 41.0 | 58.0 | 163.0 | 17.8                                 | 2.0 | 8.0  | 13.0 | 21.0 | 172.0 |
| Shijiazhuang | 50.9                                 | 9.0  | 33.0 | 47.0 | 64.0 | 180.0 | 31.8                                 | 3.0 | 13.0 | 22.0 | 40.0 | 251.0 |
| Handan       | 46.4                                 | 9.0  | 31.0 | 43.0 | 57.6 | 167.0 | 32.3                                 | 2.0 | 13.0 | 24.0 | 42.0 | 249.0 |
| Xingtai      | 54.2                                 | 8.0  | 38.0 | 51.0 | 66.0 | 181.0 | 39.5                                 | 3.0 | 17.0 | 28.0 | 48.0 | 268.0 |
| Baoding      | 49.5                                 | 10.0 | 31.0 | 43.0 | 62.0 | 177.0 | 31.6                                 | 4.0 | 13.0 | 21.0 | 38.0 | 242.0 |
| Zhangjiakou  | 24.7                                 | 4.0  | 17.0 | 22.0 | 29.0 | 96.0  | 19.1                                 | 3.0 | 10.0 | 14.0 | 22.0 | 141.0 |
| Cangzhou     | 42.8                                 | 7.0  | 29.0 | 39.0 | 54.0 | 126.0 | 29.6                                 | 5.0 | 16.0 | 23.0 | 36.0 | 198.0 |
| Hengshui     | 39.3                                 | 7.0  | 25.0 | 35.0 | 49.0 | 157.0 | 22.4                                 | 2.0 | 10.0 | 16.0 | 28.0 | 153.0 |
| Datong       | 28.0                                 | 5.0  | 19.0 | 26.5 | 35.6 | 67.0  | 37.5                                 | 8.0 | 18.2 | 28.0 | 47.0 | 232.0 |
| Jincheng     | 39.6                                 | 9.0  | 26.0 | 36.0 | 51.0 | 109.0 | 43.0                                 | 3.0 | 16.0 | 27.0 | 52.0 | 329.0 |
| Linfen       | 37.1                                 | 7.0  | 24.0 | 34.0 | 46.0 | 122.0 | 59.0                                 | 2.0 | 17.0 | 31.0 | 61.0 | 784.0 |
| Shanghai     | 43.3                                 | 6.0  | 29.0 | 40.0 | 54.0 | 138.0 | 12.0                                 | 4.0 | 8.0  | 10.0 | 14.0 | 76.0  |
| Nanjing      | 45.1                                 | 9.0  | 32.0 | 41.0 | 55.0 | 127.0 | 14.7                                 | 4.0 | 9.0  | 13.0 | 18.0 | 72.0  |
| Wuxi         | 43.2                                 | 7.0  | 30.0 | 40.0 | 53.0 | 127.0 | 15.5                                 | 3.0 | 9.0  | 13.0 | 19.0 | 72.0  |
| Hangzhou     | 44.5                                 | 8.0  | 31.0 | 42.0 | 55.0 | 119.0 | 11.2                                 | 3.0 | 7.0  | 10.0 | 13.0 | 52.0  |
| Ningbo       | 38.1                                 | 6.0  | 25.0 | 35.0 | 49.0 | 119.0 | 11.3                                 | 4.0 | 7.8  | 10.0 | 14.0 | 59.0  |
| Shaoxing     | 35.3                                 | 3.0  | 22.0 | 33.0 | 46.0 | 105.0 | 14.4                                 | 2.0 | 7.0  | 11.0 | 18.0 | 84.0  |
| Jinhua       | 35.7                                 | 7.0  | 23.0 | 33.0 | 46.0 | 118.0 | 13.1                                 | 2.0 | 7.1  | 11.0 | 17.0 | 89.0  |
| Taizhou      | 22.7                                 | 2.0  | 14.0 | 21.0 | 29.0 | 78.0  | 6.9                                  | 1.0 | 4.0  | 6.0  | 8.0  | 35.0  |
| Lishui       | 24.1                                 | 6.0  | 17.0 | 22.0 | 30.0 | 87.0  | 8.5                                  | 2.0 | 6.0  | 7.0  | 10.0 | 137.0 |
| Hefei        | 42.6                                 | 11.0 | 29.0 | 38.0 | 53.0 | 138.0 | 11.4                                 | 2.0 | 6.0  | 10.0 | 14.0 | 59.0  |
| Maanshan     | 36.3                                 | 7.0  | 25.0 | 33.0 | 45.0 | 116.0 | 17.5                                 | 3.0 | 11.0 | 15.0 | 22.0 | 89.0  |
| Huangshan    | 17.6                                 | 6.0  | 14.0 | 16.0 | 21.0 | 48.0  | 11.2                                 | 4.0 | 8.0  | 10.0 | 13.0 | 51.0  |
| Chuzhou      | 36.3                                 | 4.0  | 23.0 | 32.0 | 45.4 | 136.0 | 13.6                                 | 3.0 | 9.0  | 12.0 | 16.0 | 65.0  |
| Fuyang       | 32.6                                 | 5.0  | 22.0 | 30.0 | 40.0 | 100.0 | 15.6                                 | 2.0 | 7.0  | 12.0 | 21.0 | 194.0 |
| Luan         | 31.6                                 | 8.0  | 21.0 | 28.0 | 39.0 | 111.0 | 10.4                                 | 3.0 | 7.0  | 10.0 | 13.0 | 69.0  |
| Chizhou      | 31.6                                 | 8.0  | 21.0 | 28.0 | 39.0 | 93.0  | 16.3                                 | 2.0 | 9.0  | 14.0 | 21.0 | 120.0 |
| Fuzhou       | 28.0                                 | 4.0  | 19.0 | 26.0 | 34.0 | 87.0  | 6.1                                  | 2.0 | 5.0  | 6.0  | 7.0  | 20.0  |
| Quanzhou     | 25.6                                 | 4.0  | 19.0 | 24.0 | 30.0 | 89.0  | 10.3                                 | 3.0 | 7.0  | 9.0  | 12.0 | 41.0  |
| Nanchang     | 34.6                                 | 10.0 | 23.0 | 31.0 | 42.0 | 104.0 | 15.4                                 | 3.0 | 8.0  | 13.0 | 20.8 | 93.0  |
| Yingtian     | 23.9                                 | 5.0  | 15.0 | 21.0 | 31.0 | 76.0  | 26.9                                 | 3.0 | 15.0 | 22.0 | 35.0 | 139.0 |
| Ganzhou      | 23.9                                 | 7.0  | 15.0 | 20.0 | 29.0 | 84.0  | 22.4                                 | 3.0 | 13.0 | 19.0 | 28.0 | 132.0 |
| Jian         | 21.2                                 | 5.0  | 12.0 | 18.0 | 28.0 | 69.0  | 22.7                                 | 3.0 | 15.0 | 20.0 | 28.0 | 104.0 |
| Shangrao     | 27.0                                 | 4.0  | 17.0 | 24.0 | 35.0 | 83.0  | 30.9                                 | 2.0 | 14.0 | 24.0 | 42.0 | 168.0 |
| Dezhou       | 37.4                                 | 5.0  | 24.0 | 34.0 | 47.0 | 138.0 | 26.0                                 | 2.0 | 12.0 | 20.0 | 32.0 | 179.0 |
| Liaocheng    | 40.2                                 | 8.0  | 26.8 | 37.0 | 51.0 | 113.0 | 25.7                                 | 2.0 | 12.0 | 20.0 | 33.3 | 123.0 |
| Heze         | 36.7                                 | 7.0  | 25.0 | 34.0 | 46.0 | 102.0 | 24.8                                 | 4.0 | 12.0 | 20.0 | 32.0 | 135.0 |
| Luoyang      | 42.4                                 | 12.0 | 29.0 | 39.0 | 52.0 | 110.0 | 27.1                                 | 2.0 | 12.6 | 20.3 | 35.0 | 156.0 |
| Pingdingshan | 39.0                                 | 12.0 | 28.0 | 37.0 | 48.0 | 117.0 | 28.0                                 | 5.0 | 14.0 | 21.0 | 36.0 | 133.0 |
| Anyang       | 45.8                                 | 8.0  | 31.0 | 43.0 | 56.0 | 160.0 | 32.9                                 | 2.0 | 14.0 | 24.0 | 41.0 | 198.0 |

Table S3. (continued).

| City      | NO <sub>2</sub> (µg/m <sup>3</sup> ) |      |      |      |      |       | SO <sub>2</sub> (µg/m <sup>3</sup> ) |     |      |      |      |       |
|-----------|--------------------------------------|------|------|------|------|-------|--------------------------------------|-----|------|------|------|-------|
|           | Mean                                 | Q0   | Q25  | Q50  | Q75  | Q100  | Mean                                 | Q0  | Q25  | Q50  | Q75  | Q100  |
| Xinxiang  | 48.3                                 | 10.0 | 33.0 | 45.0 | 61.0 | 166.0 | 30.6                                 | 4.0 | 15.0 | 23.0 | 37.0 | 229.0 |
| Nanyang   | 30.2                                 | 8.0  | 20.0 | 27.0 | 38.0 | 102.0 | 16.1                                 | 2.0 | 8.0  | 13.0 | 22.0 | 115.0 |
| Shangqiu  | 32.6                                 | 6.0  | 20.0 | 29.6 | 42.0 | 106.0 | 17.3                                 | 3.0 | 8.0  | 13.0 | 20.0 | 159.0 |
| Xinyang   | 27.4                                 | 6.0  | 17.0 | 25.0 | 35.0 | 120.0 | 12.5                                 | 4.0 | 7.0  | 10.0 | 16.0 | 86.0  |
| Zhoukou   | 28.5                                 | 4.0  | 19.0 | 26.0 | 36.0 | 78.0  | 16.0                                 | 4.0 | 9.0  | 13.0 | 20.0 | 90.0  |
| Zhumadian | 33.8                                 | 7.0  | 22.0 | 31.0 | 42.0 | 104.0 | 21.9                                 | 3.0 | 9.0  | 15.0 | 27.0 | 184.0 |
| Wuhan     | 47.5                                 | 13.0 | 32.0 | 44.0 | 59.0 | 125.0 | 12.0                                 | 2.0 | 6.0  | 10.0 | 15.0 | 78.0  |
| Jingzhou  | 36.7                                 | 8.0  | 25.0 | 33.0 | 46.0 | 100.0 | 19.4                                 | 3.0 | 10.0 | 16.0 | 25.8 | 100.0 |
| Huanggang | 25.4                                 | 3.0  | 15.0 | 22.0 | 33.0 | 87.0  | 11.3                                 | 1.0 | 6.0  | 9.0  | 15.0 | 90.0  |
| Enshi     | 21.9                                 | 2.0  | 15.0 | 20.0 | 28.0 | 97.0  | 8.8                                  | 2.0 | 5.0  | 7.0  | 10.0 | 88.0  |
| Changsha  | 36.4                                 | 10.0 | 24.0 | 32.5 | 45.1 | 109.0 | 12.9                                 | 3.0 | 8.0  | 11.0 | 16.0 | 73.0  |
| Zhuzhou   | 34.3                                 | 11.0 | 23.0 | 32.0 | 43.0 | 102.0 | 19.1                                 | 4.0 | 11.0 | 16.0 | 23.0 | 99.0  |
| Shaoyang  | 23.0                                 | 6.0  | 15.0 | 20.0 | 29.0 | 75.0  | 25.9                                 | 3.0 | 14.0 | 22.0 | 33.0 | 108.0 |
| Yueyang   | 24.8                                 | 5.0  | 16.0 | 22.0 | 31.0 | 67.0  | 16.3                                 | 3.0 | 9.0  | 14.0 | 21.0 | 72.0  |
| Chenzhou  | 25.8                                 | 2.0  | 18.0 | 24.0 | 32.0 | 70.0  | 15.5                                 | 3.0 | 9.0  | 13.0 | 19.0 | 97.0  |
| Yongzhou  | 25.4                                 | 5.0  | 16.0 | 23.0 | 32.0 | 95.0  | 16.8                                 | 2.0 | 7.0  | 13.0 | 22.0 | 133.0 |
| Huaihua   | 18.5                                 | 2.0  | 11.0 | 16.0 | 24.0 | 78.0  | 14.8                                 | 2.0 | 6.0  | 11.0 | 19.0 | 186.0 |
| Loudi     | 23.0                                 | 7.0  | 14.0 | 20.0 | 28.0 | 91.0  | 18.7                                 | 2.0 | 10.0 | 15.0 | 25.0 | 94.0  |
| Guangzhou | 47.9                                 | 9.0  | 34.0 | 43.0 | 57.0 | 177.0 | 10.7                                 | 3.0 | 8.0  | 10.0 | 13.0 | 38.0  |
| Shaoguan  | 26.4                                 | 8.0  | 19.0 | 24.0 | 31.0 | 82.0  | 15.6                                 | 5.0 | 11.0 | 14.0 | 19.0 | 65.0  |
| Shenzhen  | 29.9                                 | 7.0  | 23.0 | 28.0 | 35.0 | 103.0 | 7.4                                  | 3.0 | 6.0  | 7.0  | 8.0  | 19.0  |
| Zhuhai    | 30.1                                 | 4.0  | 18.0 | 27.0 | 39.0 | 102.0 | 7.5                                  | 2.0 | 4.0  | 7.0  | 9.0  | 31.0  |
| Foshan    | 41.6                                 | 7.0  | 29.0 | 37.0 | 50.0 | 141.0 | 12.8                                 | 3.0 | 9.0  | 12.0 | 15.0 | 45.0  |
| Jiangmen  | 34.0                                 | 5.0  | 19.0 | 30.0 | 44.0 | 149.0 | 11.2                                 | 3.0 | 7.0  | 9.0  | 14.0 | 52.0  |
| Zhaoqing  | 33.8                                 | 6.0  | 22.0 | 30.0 | 42.0 | 113.0 | 14.5                                 | 4.0 | 9.0  | 13.0 | 18.0 | 46.0  |
| Huizhou   | 23.8                                 | 4.0  | 17.0 | 22.0 | 29.0 | 72.0  | 8.6                                  | 4.0 | 7.0  | 8.0  | 10.0 | 23.0  |
| Shanwei   | 12.3                                 | 3.0  | 8.0  | 11.0 | 15.0 | 38.0  | 9.1                                  | 5.0 | 8.0  | 9.0  | 10.0 | 153.0 |
| Heyuan    | 21.6                                 | 6.0  | 15.0 | 19.0 | 25.0 | 69.0  | 8.4                                  | 3.0 | 6.0  | 7.0  | 10.0 | 33.0  |
| Yangjiang | 19.3                                 | 2.0  | 11.0 | 17.5 | 25.0 | 74.0  | 7.8                                  | 2.0 | 5.0  | 7.0  | 10.0 | 29.0  |
| Qingyuan  | 36.3                                 | 9.0  | 26.0 | 33.0 | 43.0 | 112.0 | 13.4                                 | 3.0 | 9.0  | 12.0 | 16.0 | 55.0  |
| Dongguan  | 36.7                                 | 9.0  | 27.0 | 34.0 | 45.0 | 117.0 | 11.3                                 | 3.0 | 8.0  | 10.0 | 14.0 | 37.0  |
| Zhongshan | 32.3                                 | 3.0  | 18.0 | 29.0 | 43.0 | 120.0 | 9.7                                  | 2.0 | 6.0  | 8.0  | 12.0 | 35.0  |
| Nanning   | 32.7                                 | 10.0 | 23.0 | 29.0 | 38.0 | 99.0  | 11.2                                 | 5.0 | 8.0  | 10.0 | 13.0 | 53.0  |
| Chongqing | 43.2                                 | 15.0 | 33.1 | 42.0 | 51.0 | 104.0 | 11.5                                 | 4.0 | 8.0  | 10.0 | 14.0 | 43.0  |
| Chengdu   | 49.8                                 | 13.0 | 37.0 | 48.0 | 59.0 | 136.0 | 11.5                                 | 4.0 | 8.0  | 10.0 | 14.0 | 39.0  |
| Guiyang   | 25.9                                 | 9.0  | 19.0 | 24.0 | 31.0 | 70.0  | 12.8                                 | 3.0 | 6.0  | 9.0  | 15.0 | 90.0  |
| Kunming   | 30.9                                 | 7.0  | 24.0 | 30.0 | 36.0 | 78.0  | 14.8                                 | 5.0 | 11.0 | 14.0 | 18.0 | 44.0  |
| Xian      | 51.5                                 | 12.0 | 36.0 | 48.0 | 64.0 | 128.0 | 17.2                                 | 3.0 | 8.0  | 13.0 | 22.0 | 96.0  |
| Hanzhong  | 29.8                                 | 7.0  | 20.0 | 27.0 | 38.0 | 89.0  | 13.4                                 | 2.0 | 8.0  | 12.0 | 18.0 | 56.0  |
| Tianshui  | 35.0                                 | 8.0  | 23.0 | 31.0 | 45.0 | 100.0 | 22.5                                 | 3.0 | 9.0  | 12.0 | 25.0 | 156.0 |
| Dingxi    | 27.3                                 | 4.0  | 19.0 | 26.0 | 35.0 | 65.0  | 20.5                                 | 2.0 | 6.0  | 10.0 | 30.0 | 132.0 |

Note: SO<sub>2</sub>, sulfur dioxide; NO<sub>2</sub>, nitrogen dioxide; Q, quantile.



Table S4. Distribution of daily average concentrations of CO and O<sub>3</sub> in 82 cities in China, 2015–2019.

| City         | CO (mg/m <sup>3</sup> ) |     |     |     |     |      | O <sub>3</sub> (µg/m <sup>3</sup> ) |      |      |       |       |       |
|--------------|-------------------------|-----|-----|-----|-----|------|-------------------------------------|------|------|-------|-------|-------|
|              | Mean                    | Q0  | Q25 | Q50 | Q75 | Q100 | Mean                                | Q0   | Q25  | Q50   | Q75   | Q100  |
| Beijing      | 1.0                     | 0.2 | 0.5 | 0.8 | 1.1 | 8.2  | 100.1                               | 3.0  | 55.0 | 86.0  | 141.0 | 288.0 |
| Tianjin      | 1.2                     | 0.3 | 0.8 | 1.0 | 1.4 | 8.9  | 96.3                                | 3.0  | 51.0 | 85.0  | 134.0 | 285.0 |
| Shijiazhuang | 1.3                     | 0.1 | 0.7 | 1.0 | 1.5 | 10.6 | 97.2                                | 3.0  | 49.0 | 89.0  | 136.9 | 297.0 |
| Handan       | 1.5                     | 0.2 | 0.8 | 1.1 | 1.8 | 8.8  | 101.3                               | 4.0  | 55.0 | 95.0  | 138.8 | 289.0 |
| Xingtai      | 1.6                     | 0.2 | 0.9 | 1.3 | 1.9 | 8.8  | 99.1                                | 3.0  | 50.0 | 93.0  | 138.0 | 286.0 |
| Baoding      | 1.3                     | 0.1 | 0.6 | 0.9 | 1.5 | 9.8  | 106.0                               | 5.0  | 53.0 | 97.0  | 151.0 | 300.0 |
| Zhangjiakou  | 0.7                     | 0.1 | 0.5 | 0.6 | 0.9 | 3.6  | 104.7                               | 7.0  | 72.0 | 96.0  | 131.0 | 262.0 |
| Cangzhou     | 1.0                     | 0.1 | 0.6 | 0.8 | 1.2 | 6.2  | 106.3                               | 5.0  | 61.0 | 101.0 | 144.0 | 297.0 |
| Hengshui     | 1.1                     | 0.2 | 0.7 | 0.9 | 1.4 | 8.3  | 108.7                               | 4.0  | 62.0 | 104.0 | 151.0 | 274.0 |
| Datong       | 1.4                     | 0.4 | 1.0 | 1.3 | 1.8 | 4.4  | 92.7                                | 8.0  | 62.0 | 88.0  | 119.0 | 282.0 |
| Jincheng     | 1.7                     | 0.3 | 1.1 | 1.5 | 2.1 | 7.1  | 103.5                               | 5.0  | 61.0 | 90.0  | 136.8 | 300.0 |
| Linfen       | 2.0                     | 0.3 | 1.2 | 1.7 | 2.4 | 19.5 | 101.7                               | 3.0  | 55.0 | 89.5  | 138.8 | 300.0 |
| Shanghai     | 0.7                     | 0.3 | 0.6 | 0.7 | 0.9 | 2.3  | 105.7                               | 13.0 | 75.0 | 98.0  | 130.0 | 285.0 |
| Nanjing      | 0.9                     | 0.3 | 0.7 | 0.9 | 1.1 | 2.3  | 106.1                               | 8.0  | 67.0 | 99.0  | 139.9 | 280.0 |
| Wuxi         | 1.0                     | 0.3 | 0.8 | 0.9 | 1.2 | 2.6  | 104.1                               | 5.0  | 63.0 | 95.0  | 141.0 | 269.0 |
| Hangzhou     | 0.9                     | 0.4 | 0.7 | 0.8 | 1.0 | 2.1  | 98.4                                | 4.0  | 58.0 | 90.0  | 137.0 | 269.0 |
| Ningbo       | 0.8                     | 0.4 | 0.6 | 0.7 | 0.9 | 2.0  | 98.4                                | 6.0  | 70.0 | 94.0  | 124.0 | 255.0 |
| Shaoxing     | 0.8                     | 0.3 | 0.6 | 0.8 | 0.9 | 1.9  | 95.4                                | 1.0  | 60.0 | 89.0  | 126.0 | 271.0 |
| Jinhua       | 0.8                     | 0.3 | 0.6 | 0.7 | 0.9 | 2.1  | 95.2                                | 2.0  | 59.0 | 91.1  | 128.0 | 251.0 |
| Taizhou      | 0.7                     | 0.2 | 0.5 | 0.6 | 0.8 | 3.6  | 95.6                                | 6.0  | 69.0 | 93.0  | 120.0 | 221.0 |
| Lishui       | 0.7                     | 0.2 | 0.5 | 0.6 | 0.8 | 1.9  | 86.9                                | 7.0  | 61.0 | 86.0  | 110.8 | 198.0 |
| Hefei        | 0.9                     | 0.3 | 0.7 | 0.8 | 1.0 | 2.9  | 92.9                                | 4.0  | 57.2 | 88.0  | 121.0 | 264.0 |
| Maanshan     | 1.1                     | 0.3 | 0.8 | 1.1 | 1.4 | 2.9  | 99.8                                | 2.0  | 60.0 | 92.0  | 133.0 | 282.0 |
| Huangshan    | 0.5                     | 0.0 | 0.4 | 0.5 | 0.7 | 2.0  | 73.5                                | 20.0 | 53.0 | 71.0  | 89.0  | 211.0 |
| Chuzhou      | 0.8                     | 0.2 | 0.6 | 0.8 | 1.0 | 2.5  | 94.1                                | 13.0 | 53.0 | 88.0  | 127.0 | 280.0 |
| Fuyang       | 0.8                     | 0.1 | 0.6 | 0.7 | 1.0 | 3.4  | 92.7                                | 7.0  | 59.0 | 86.0  | 123.0 | 246.0 |
| Luan         | 0.7                     | 0.3 | 0.6 | 0.7 | 0.8 | 2.0  | 92.0                                | 17.0 | 62.0 | 88.0  | 119.0 | 225.0 |
| Chizhou      | 0.8                     | 0.2 | 0.6 | 0.8 | 1.0 | 2.5  | 88.7                                | 1.0  | 56.0 | 83.0  | 118.0 | 225.0 |
| Fuzhou       | 0.7                     | 0.3 | 0.6 | 0.7 | 0.8 | 2.0  | 88.5                                | 11.0 | 63.0 | 87.0  | 112.0 | 205.0 |
| Quanzhou     | 0.6                     | 0.1 | 0.5 | 0.6 | 0.7 | 2.0  | 91.4                                | 8.0  | 67.0 | 89.0  | 113.0 | 213.0 |
| Nanchang     | 1.0                     | 0.3 | 0.8 | 1.0 | 1.1 | 2.5  | 88.0                                | 5.0  | 56.0 | 87.0  | 116.0 | 209.0 |
| Yingtian     | 0.7                     | 0.1 | 0.5 | 0.6 | 0.8 | 1.9  | 92.0                                | 6.0  | 64.0 | 90.0  | 119.0 | 244.0 |
| Ganzhou      | 1.3                     | 0.6 | 1.1 | 1.3 | 1.5 | 3.0  | 88.2                                | 7.0  | 61.0 | 84.0  | 112.0 | 213.0 |
| Jian         | 0.8                     | 0.2 | 0.6 | 0.8 | 0.9 | 1.8  | 88.5                                | 5.0  | 59.0 | 86.0  | 114.8 | 234.0 |
| Shangrao     | 0.8                     | 0.2 | 0.6 | 0.8 | 0.9 | 4.6  | 87.6                                | 2.0  | 60.0 | 85.0  | 113.0 | 244.0 |
| Dezhou       | 1.4                     | 0.2 | 0.9 | 1.2 | 1.6 | 25.7 | 115.1                               | 5.0  | 64.0 | 109.5 | 161.0 | 273.0 |
| Liaocheng    | 1.4                     | 0.2 | 0.8 | 1.2 | 1.7 | 6.2  | 107.6                               | 4.0  | 59.0 | 100.0 | 150.0 | 293.0 |
| Heze         | 1.3                     | 0.1 | 0.9 | 1.2 | 1.5 | 7.2  | 112.3                               | 5.0  | 71.0 | 109.0 | 150.0 | 300.0 |
| Luoyang      | 1.5                     | 0.2 | 1.0 | 1.4 | 1.8 | 6.6  | 102.0                               | 4.0  | 57.0 | 93.0  | 142.8 | 277.0 |
| Pingdingshan | 1.1                     | 0.3 | 0.8 | 1.0 | 1.3 | 3.5  | 108.5                               | 9.0  | 69.2 | 105.0 | 145.8 | 286.0 |
| Anyang       | 1.8                     | 0.3 | 1.1 | 1.5 | 2.1 | 14.2 | 99.9                                | 5.0  | 51.0 | 90.0  | 141.0 | 288.0 |

Table S4. (continued).

| City      | CO (mg/m <sup>3</sup> ) |     |     |     |     |      | O <sub>3</sub> (μg/m <sup>3</sup> ) |      |      |       |       |       |
|-----------|-------------------------|-----|-----|-----|-----|------|-------------------------------------|------|------|-------|-------|-------|
|           | Mean                    | Q0  | Q25 | Q50 | Q75 | Q100 | Mean                                | Q0   | Q25  | Q50   | Q75   | Q100  |
| Xinxiang  | 1.3                     | 0.2 | 0.8 | 1.1 | 1.5 | 7.8  | 103.0                               | 3.0  | 58.0 | 96.0  | 144.0 | 278.0 |
| Nanyang   | 1.1                     | 0.2 | 0.8 | 1.0 | 1.4 | 3.4  | 106.4                               | 6.0  | 69.0 | 104.0 | 141.0 | 252.0 |
| Shangqiu  | 0.8                     | 0.2 | 0.6 | 0.7 | 0.9 | 4.3  | 105.1                               | 4.0  | 68.0 | 102.0 | 138.0 | 252.0 |
| Xinyang   | 0.8                     | 0.1 | 0.5 | 0.7 | 0.9 | 2.7  | 104.3                               | 4.0  | 72.0 | 104.0 | 134.0 | 238.0 |
| Zhoukou   | 1.3                     | 0.4 | 0.8 | 1.0 | 1.5 | 4.9  | 103.2                               | 5.0  | 65.0 | 100.0 | 136.0 | 268.0 |
| Zhumadian | 0.9                     | 0.1 | 0.6 | 0.8 | 1.0 | 3.4  | 106.8                               | 4.0  | 71.0 | 102.0 | 140.0 | 300.0 |
| Wuhan     | 1.0                     | 0.4 | 0.8 | 1.0 | 1.2 | 2.7  | 93.6                                | 5.0  | 53.0 | 88.0  | 128.0 | 261.0 |
| Jingzhou  | 1.1                     | 0.4 | 0.9 | 1.0 | 1.3 | 3.0  | 96.7                                | 5.0  | 64.0 | 93.5  | 125.9 | 250.0 |
| Huanggang | 1.0                     | 0.1 | 0.8 | 0.9 | 1.2 | 3.4  | 108.6                               | 8.0  | 72.0 | 106.0 | 143.0 | 281.0 |
| Enshi     | 0.9                     | 0.0 | 0.7 | 0.8 | 1.0 | 3.7  | 62.8                                | 2.0  | 38.0 | 61.0  | 85.0  | 174.0 |
| Changsha  | 0.9                     | 0.4 | 0.7 | 0.9 | 1.0 | 2.2  | 90.4                                | 6.0  | 54.0 | 86.0  | 122.0 | 232.0 |
| Zhuzhou   | 0.8                     | 0.3 | 0.6 | 0.8 | 1.0 | 2.1  | 84.7                                | 3.0  | 51.2 | 82.0  | 115.0 | 230.0 |
| Shaoyang  | 0.9                     | 0.3 | 0.7 | 0.9 | 1.0 | 2.9  | 86.6                                | 6.0  | 60.0 | 84.0  | 110.0 | 208.0 |
| Yueyang   | 1.0                     | 0.4 | 0.8 | 0.9 | 1.1 | 3.3  | 96.0                                | 7.0  | 63.0 | 95.0  | 126.0 | 221.0 |
| Chenzhou  | 1.2                     | 0.4 | 0.9 | 1.2 | 1.4 | 10.2 | 80.4                                | 8.0  | 49.0 | 79.0  | 107.0 | 275.0 |
| Yongzhou  | 0.7                     | 0.2 | 0.5 | 0.7 | 0.8 | 2.0  | 82.7                                | 8.0  | 58.0 | 78.0  | 104.0 | 203.0 |
| Huaihua   | 1.1                     | 0.3 | 0.9 | 1.1 | 1.2 | 2.0  | 83.6                                | 16.0 | 61.0 | 80.0  | 102.0 | 193.0 |
| Loudi     | 1.5                     | 0.3 | 1.1 | 1.4 | 1.8 | 3.6  | 91.4                                | 9.0  | 67.0 | 88.0  | 112.8 | 207.0 |
| Guangzhou | 0.9                     | 0.4 | 0.7 | 0.9 | 1.0 | 2.1  | 91.1                                | 5.0  | 52.0 | 86.0  | 122.8 | 275.0 |
| Shaoguan  | 1.0                     | 0.4 | 0.8 | 0.9 | 1.1 | 2.9  | 89.1                                | 7.0  | 60.2 | 86.0  | 115.0 | 239.0 |
| Shenzhen  | 0.7                     | 0.4 | 0.6 | 0.7 | 0.8 | 1.6  | 88.6                                | 11.0 | 58.0 | 82.0  | 113.0 | 245.0 |
| Zhuhai    | 0.7                     | 0.3 | 0.6 | 0.7 | 0.8 | 2.2  | 90.3                                | 14.0 | 56.0 | 80.0  | 114.0 | 276.0 |
| Foshan    | 0.8                     | 0.4 | 0.7 | 0.8 | 0.9 | 2.0  | 94.1                                | 4.0  | 54.0 | 87.0  | 127.0 | 290.0 |
| Jiangmen  | 0.9                     | 0.3 | 0.7 | 0.8 | 1.0 | 2.2  | 92.2                                | 3.0  | 50.2 | 78.0  | 124.0 | 300.0 |
| Zhaoqing  | 0.9                     | 0.4 | 0.7 | 0.9 | 1.0 | 2.4  | 90.4                                | 5.0  | 57.0 | 84.0  | 117.0 | 300.0 |
| Huizhou   | 0.7                     | 0.4 | 0.6 | 0.7 | 0.8 | 1.5  | 92.6                                | 10.0 | 65.0 | 90.0  | 116.0 | 253.0 |
| Shanwei   | 0.8                     | 0.4 | 0.7 | 0.7 | 0.8 | 1.8  | 95.7                                | 12.0 | 68.0 | 93.0  | 119.0 | 272.0 |
| Heyuan    | 0.9                     | 0.4 | 0.8 | 0.8 | 1.0 | 2.5  | 86.5                                | 8.0  | 61.0 | 84.0  | 109.0 | 211.0 |
| Yangjiang | 0.9                     | 0.4 | 0.8 | 0.9 | 1.1 | 2.4  | 89.0                                | 6.0  | 57.0 | 81.0  | 115.8 | 233.0 |
| Qingyuan  | 1.0                     | 0.4 | 0.8 | 0.9 | 1.1 | 3.5  | 89.0                                | 4.0  | 55.0 | 86.0  | 117.0 | 300.0 |
| Dongguan  | 0.8                     | 0.3 | 0.7 | 0.8 | 0.9 | 1.7  | 102.1                               | 5.0  | 65.0 | 95.0  | 134.0 | 290.0 |
| Zhongshan | 0.9                     | 0.3 | 0.7 | 0.8 | 1.0 | 2.3  | 89.2                                | 3.0  | 51.0 | 74.0  | 119.0 | 300.0 |
| Nanning   | 0.9                     | 0.5 | 0.8 | 0.9 | 1.1 | 1.9  | 75.6                                | 6.0  | 52.0 | 73.0  | 97.0  | 208.0 |
| Chongqing | 1.0                     | 0.4 | 0.8 | 0.9 | 1.1 | 4.1  | 73.2                                | 3.0  | 31.0 | 60.0  | 108.0 | 280.0 |
| Chengdu   | 1.0                     | 0.4 | 0.8 | 0.9 | 1.1 | 2.9  | 92.3                                | 3.0  | 51.0 | 81.0  | 130.0 | 292.0 |
| Guiyang   | 0.7                     | 0.3 | 0.6 | 0.7 | 0.8 | 1.7  | 77.4                                | 9.0  | 55.0 | 74.0  | 99.0  | 188.0 |
| Kunming   | 0.9                     | 0.3 | 0.7 | 0.8 | 1.0 | 2.9  | 82.3                                | 10.0 | 62.0 | 79.0  | 103.0 | 187.0 |
| Xian      | 1.4                     | 0.3 | 0.9 | 1.2 | 1.7 | 5.3  | 88.7                                | 6.0  | 44.0 | 78.5  | 129.8 | 267.0 |
| Hanzhong  | 1.2                     | 0.4 | 0.8 | 1.0 | 1.5 | 4.4  | 82.7                                | 5.0  | 52.0 | 82.0  | 111.0 | 198.0 |
| Tianshui  | 0.8                     | 0.2 | 0.5 | 0.7 | 1.1 | 3.7  | 90.2                                | 5.0  | 65.0 | 91.0  | 116.0 | 210.0 |
| Dingxi    | 0.7                     | 0.1 | 0.4 | 0.6 | 0.9 | 2.8  | 95.3                                | 13.0 | 72.0 | 94.0  | 117.0 | 210.0 |

Note: CO, carbon monoxide; O<sub>3</sub>, ozone; Q, quantile.

**Table S5.** Detailed information of data sources used in this study on the association between influenza and air pollution in 82 cities in China, 2015–2019.

| Items                                                 | Time                     | Scale             | Unit              | Data sources                                                                                                     |                                                                                                                                                                                                                |
|-------------------------------------------------------|--------------------------|-------------------|-------------------|------------------------------------------------------------------------------------------------------------------|----------------------------------------------------------------------------------------------------------------------------------------------------------------------------------------------------------------|
| <b>Influenza information</b>                          |                          |                   |                   |                                                                                                                  |                                                                                                                                                                                                                |
| Case report                                           | 2015-01-01 to 2019-12-31 | Daily; City-level |                   | Chinese Information System for Disease Control and Prevention                                                    | Chinese Center for Disease Prevention and Control                                                                                                                                                              |
| Case identification                                   | 2008-09-01 till now      |                   |                   | Diagnostic Criteria for Influenza (WS285-2008)<br>(National Health Commission of the People's Republic of China) | <a href="http://www.nhc.gov.cn/wjw/s9491/200802/38820.shtml">http://www.nhc.gov.cn/wjw/s9491/200802/38820.shtml</a>                                                                                            |
| <b>Meteorological information</b>                     |                          |                   |                   |                                                                                                                  |                                                                                                                                                                                                                |
| Temperature                                           | 2015-01-01 to 2019-12-31 | Daily; City-level | °C                | China Meteorological Data Service Center                                                                         | <a href="http://data.cma.cn">http://data.cma.cn</a>                                                                                                                                                            |
| Relative humidity                                     |                          |                   | %                 |                                                                                                                  |                                                                                                                                                                                                                |
| <b>Ambient air pollutants information*</b>            |                          |                   |                   |                                                                                                                  |                                                                                                                                                                                                                |
| PM <sub>2.5</sub>                                     | 2015-01-01 to 2019-12-31 | Daily; City-level | μg/m <sup>3</sup> | China National Environmental Monitoring Center                                                                   | <a href="http://www.cnemc.cn/sss/">http://www.cnemc.cn/sss/</a>                                                                                                                                                |
| PM <sub>10</sub>                                      |                          |                   | μg/m <sup>3</sup> |                                                                                                                  |                                                                                                                                                                                                                |
| SO <sub>2</sub>                                       |                          |                   | μg/m <sup>3</sup> |                                                                                                                  |                                                                                                                                                                                                                |
| NO <sub>2</sub>                                       |                          |                   | μg/m <sup>3</sup> |                                                                                                                  |                                                                                                                                                                                                                |
| O <sub>3</sub>                                        |                          |                   | μg/m <sup>3</sup> |                                                                                                                  |                                                                                                                                                                                                                |
| CO                                                    |                          |                   | mg/m <sup>3</sup> |                                                                                                                  |                                                                                                                                                                                                                |
| <b>Demographic information</b>                        |                          |                   |                   |                                                                                                                  |                                                                                                                                                                                                                |
| Population and age structure                          | 2020                     | City-level        |                   | The Seventh National Census of China                                                                             | <a href="http://www.stats.gov.cn/tjsj/pcsj/rkpc/7rp/zk/indexce.htm">http://www.stats.gov.cn/tjsj/pcsj/rkpc/7rp/zk/indexce.htm</a>                                                                              |
| Population weighted geometric mean of density (PWD-G) | 2020                     | City-level        | /km <sup>2</sup>  | Asia Continental Population Dataset (WorldPop)                                                                   | <a href="https://www.worldpop.org/doi/10.5258/SOTON/WP00013">https://www.worldpop.org/doi/10.5258/SOTON/WP00013</a><br><a href="https://www.worldpop.org/methods/pwd">https://www.worldpop.org/methods/pwd</a> |

\* PM, particulate matter; SO<sub>2</sub>, sulfur dioxide; NO<sub>2</sub>, nitrogen dioxide; O<sub>3</sub>, ozone; CO, carbon monoxide.

Table S6. Data summary of the distribution of daily incidence and distribution of variance/mean ratio for daily counts of influenza case in the 82 Chinese cities.

|             | Daily incidence (/100,000) | Variance/Mean of daily cases counts |
|-------------|----------------------------|-------------------------------------|
| Minimum     | 0.01                       | 5.00                                |
| 1st Quarter | 0.06                       | 12.25                               |
| Median      | 0.10                       | 57.00                               |
| Mean        | 0.34                       | 187.29                              |
| 3rd Quarter | 0.25                       | 171.00                              |
| Maximum     | 9.15                       | 1663.00                             |

**Table S7.** Pearson correlation coefficients and p values between daily influenza incidence and air pollutants concentrations.

| City         | Pearson correlation coefficients (p value) |                  |                 |                 |                 |                 |
|--------------|--------------------------------------------|------------------|-----------------|-----------------|-----------------|-----------------|
|              | PM <sub>2.5</sub>                          | PM <sub>10</sub> | NO <sub>2</sub> | SO <sub>2</sub> | O <sub>3</sub>  | CO              |
| Beijing      | -0.062 (0.008)                             | -0.051 (0.031)   | 0.019 (0.412)   | -0.016 (0.481)  | -0.233 (<0.001) | -0.036 (0.124)  |
| Tianjin      | 0.018 (0.445)                              | -0.032 (0.167)   | 0.117 (<0.001)  | -0.038 (0.103)  | -0.208 (<0.001) | 0.017 (0.472)   |
| Shijiazhuang | 0.035 (0.137)                              | 0.032 (0.17)     | 0.089 (<0.001)  | -0.041 (0.079)  | -0.192 (<0.001) | 0.052 (0.026)   |
| Handan       | 0.202 (<0.001)                             | 0.180 (<0.001)   | 0.245 (<0.001)  | 0.162 (<0.001)  | -0.290 (<0.001) | 0.163 (<0.001)  |
| Xingtai      | 0.090 (<0.001)                             | 0.079 (<0.001)   | 0.082 (<0.001)  | -0.044 (0.06)   | -0.236 (<0.001) | 0.060 (0.01)    |
| Baoding      | 0.016 (0.508)                              | 0.001 (0.953)    | 0.066 (0.005)   | -0.093 (<0.001) | -0.229 (<0.001) | 0.019 (0.41)    |
| Zhangjiakou  | 0.005 (0.846)                              | 0.010 (0.665)    | 0.092 (<0.001)  | 0.082 (<0.001)  | -0.288 (<0.001) | 0.152 (<0.001)  |
| Cangzhou     | 0.145 (<0.001)                             | 0.129 (<0.001)   | 0.230 (<0.001)  | 0.052 (0.028)   | -0.326 (<0.001) | 0.170 (<0.001)  |
| Hengshui     | 0.122 (<0.001)                             | 0.076 (0.001)    | 0.224 (<0.001)  | 0.083 (<0.001)  | -0.317 (<0.001) | 0.141 (<0.001)  |
| Datong       | 0.061 (0.009)                              | 0.048 (0.039)    | 0.096 (<0.001)  | 0.136 (<0.001)  | -0.239 (<0.001) | 0.136 (<0.001)  |
| Jincheng     | 0.150 (<0.001)                             | 0.141 (<0.001)   | 0.147 (<0.001)  | 0.043 (0.068)   | -0.162 (<0.001) | 0.024 (0.302)   |
| Linfen       | 0.213 (<0.001)                             | 0.195 (<0.001)   | 0.296 (<0.001)  | 0.188 (<0.001)  | -0.336 (<0.001) | 0.148 (<0.001)  |
| Shanghai     | 0.080 (<0.001)                             | -0.0001 (0.995)  | 0.131 (<0.001)  | -0.078 (<0.001) | -0.174 (<0.001) | 0.063 (0.007)   |
| Nanjing      | 0.065 (0.006)                              | 0.013 (0.589)    | 0.041 (0.078)   | -0.115 (<0.001) | -0.163 (<0.001) | 0.015 (0.511)   |
| Wuxi         | 0.098 (<0.001)                             | 0.080 (<0.001)   | 0.081 (<0.001)  | -0.138 (<0.001) | -0.202 (<0.001) | 0.097 (<0.001)  |
| Hangzhou     | 0.037 (0.119)                              | 0.035 (0.133)    | 0.059 (0.011)   | -0.12 (<0.001)  | -0.171 (<0.001) | 0.064 (0.007)   |
| Ningbo       | 0.049 (0.037)                              | 0.026 (0.266)    | 0.095 (<0.001)  | -0.114 (<0.001) | -0.157 (<0.001) | 0.071 (0.002)   |
| Shaoxing     | 0.039 (0.098)                              | 0.04 (0.089)     | 0.125 (<0.001)  | -0.146 (<0.001) | -0.170 (<0.001) | 0.110 (<0.001)  |
| Jinhua       | -0.007 (0.754)                             | 0.014 (0.553)    | 0.172 (<0.001)  | -0.101 (<0.001) | -0.224 (<0.001) | 0.092 (<0.001)  |
| Taizhou      | 0.041 (0.078)                              | 0.050 (0.033)    | 0.173 (<0.001)  | -0.102 (<0.001) | -0.125 (<0.001) | -0.014 (0.553)  |
| Lishui       | -0.006 (0.799)                             | -0.002 (0.92)    | 0.089 (<0.001)  | -0.081 (<0.001) | -0.135 (<0.001) | 0.148 (<0.001)  |
| Hefei        | 0.076 (0.001)                              | -0.022 (0.338)   | 0.096 (<0.001)  | -0.166 (<0.001) | -0.176 (<0.001) | 0.002 (0.92)    |
| Maanshan     | 0.184 (<0.001)                             | 0.089 (<0.001)   | 0.222 (<0.001)  | -0.002 (0.936)  | -0.193 (<0.001) | 0.012 (0.597)   |
| Huangshan    | 0.060 (0.01)                               | 0.023 (0.33)     | 0.145 (<0.001)  | -0.179 (<0.001) | -0.052 (0.025)  | 0.270 (<0.001)  |
| Chuzhou      | 0.150 (<0.001)                             | 0.103 (<0.001)   | 0.134 (<0.001)  | -0.140 (<0.001) | -0.070 (0.003)  | 0.082 (<0.001)  |
| Fuyang       | 0.254 (<0.001)                             | 0.205 (<0.001)   | 0.131 (<0.001)  | -0.143 (<0.001) | -0.202 (<0.001) | 0.083 (<0.001)  |
| Luan         | 0.061 (0.009)                              | 0.035 (0.136)    | 0.127 (<0.001)  | -0.161 (<0.001) | -0.076 (0.001)  | 0.063 (0.007)   |
| Chizhou      | 0.086 (<0.001)                             | 0.046 (0.048)    | 0.193 (<0.001)  | -0.099 (<0.001) | -0.152 (<0.001) | 0.019 (0.411)   |
| Fuzhou       | 0.040 (0.088)                              | -0.027 (0.25)    | 0.069 (0.003)   | -0.090 (<0.001) | -0.106 (<0.001) | 0.027 (0.244)   |
| Quanzhou     | 0.046 (0.05)                               | -0.005 (0.817)   | 0.095 (<0.001)  | -0.031 (0.183)  | -0.087 (<0.001) | 0.048 (0.039)   |
| Nanchang     | 0.098 (<0.001)                             | 0.049 (0.037)    | 0.092 (<0.001)  | -0.127 (<0.001) | -0.151 (<0.001) | 0.029 (0.209)   |
| Yingtan      | 0.097 (<0.001)                             | 0.026 (0.268)    | 0.166 (<0.001)  | -0.072 (0.002)  | -0.143 (<0.001) | 0.071 (0.002)   |
| Ganzhou      | -0.062 (0.008)                             | -0.026 (0.272)   | 0.089 (<0.001)  | -0.247 (<0.001) | -0.134 (<0.001) | 0.091 (<0.001)  |
| Jian         | 0.024 (0.301)                              | 0.081 (<0.001)   | 0.203 (<0.001)  | -0.113 (<0.001) | -0.095 (<0.001) | 0.101 (<0.001)  |
| Shangrao     | 0.036 (0.12)                               | 0.056 (0.017)    | 0.132 (<0.001)  | 0.052 (0.025)   | -0.089 (<0.001) | 0.087 (<0.001)  |
| Dezhou       | 0.114 (<0.001)                             | 0.104 (<0.001)   | 0.272 (<0.001)  | 0.069 (0.003)   | -0.348 (<0.001) | 0.02 (0.388)    |
| Liaocheng    | 0.068 (0.004)                              | 0.056 (0.016)    | 0.118 (<0.001)  | -0.088 (<0.001) | -0.199 (<0.001) | -0.079 (<0.001) |
| Heze         | 0.139 (<0.001)                             | 0.148 (<0.001)   | 0.142 (<0.001)  | -0.028 (0.234)  | -0.188 (<0.001) | 0.085 (<0.001)  |
| Luoyang      | 0.076 (0.001)                              | 0.071 (0.002)    | 0.051 (0.028)   | -0.187 (<0.001) | -0.147 (<0.001) | -0.208 (<0.001) |
| Pingdingshan | 0.078 (<0.001)                             | 0.033 (0.156)    | 0.032 (0.178)   | -0.111 (<0.001) | -0.170 (<0.001) | 0.031 (0.182)   |
| Anyang       | 0.082 (<0.001)                             | 0.042 (0.071)    | 0.07 (0.003)    | -0.060 (0.01)   | -0.121 (<0.001) | -0.020 (0.402)  |

Table S7. (continued).

| City      | Pearson correlation coefficients (p value) |                  |                 |                 |                 |                 |
|-----------|--------------------------------------------|------------------|-----------------|-----------------|-----------------|-----------------|
|           | PM <sub>2.5</sub>                          | PM <sub>10</sub> | NO <sub>2</sub> | SO <sub>2</sub> | O <sub>3</sub>  | CO              |
| Xinxiang  | 0.047 (0.043)                              | 0.020 (0.405)    | 0.096 (<0.001)  | -0.120 (<0.001) | -0.157 (<0.001) | 0.036 (0.122)   |
| Nanyang   | 0.162 (<0.001)                             | 0.105 (<0.001)   | 0.206 (<0.001)  | -0.107 (<0.001) | -0.169 (<0.001) | 0.066 (0.005)   |
| Shangqiu  | 0.112 (<0.001)                             | 0.105 (<0.001)   | 0.168 (<0.001)  | -0.041 (0.081)  | -0.158 (<0.001) | 0.120 (<0.001)  |
| Xinyang   | 0.059 (0.011)                              | 0.037 (0.119)    | 0.046 (0.049)   | -0.219 (<0.001) | -0.075 (0.001)  | 0.017 (0.459)   |
| Zhoukou   | 0.094 (<0.001)                             | 0.091 (<0.001)   | 0.096 (<0.001)  | 0.086 (<0.001)  | -0.122 (<0.001) | 0.040 (0.086)   |
| Zhumadian | 0.096 (<0.001)                             | 0.082 (<0.001)   | 0.104 (<0.001)  | -0.125 (<0.001) | -0.153 (<0.001) | 0.037 (0.111)   |
| Wuhan     | 0.075 (0.001)                              | 0.008 (0.733)    | 0.061 (0.01)    | -0.063 (0.007)  | -0.190 (<0.001) | 0.065 (0.005)   |
| Jingzhou  | 0.117 (<0.001)                             | 0.118 (<0.001)   | 0.015 (0.514)   | -0.150 (<0.001) | -0.215 (<0.001) | 0.100 (<0.001)  |
| Huanggang | 0.070 (0.003)                              | 0.068 (0.004)    | 0.158 (<0.001)  | -0.067 (0.004)  | -0.255 (<0.001) | -0.038 (0.106)  |
| Enshi     | 0.025 (0.285)                              | 0.049 (0.038)    | 0.157 (<0.001)  | -0.165 (<0.001) | -0.081 (<0.001) | 0.069 (0.003)   |
| Changsha  | 0.149 (<0.001)                             | 0.011 (0.629)    | 0.098 (<0.001)  | -0.181 (<0.001) | -0.187 (<0.001) | 0.182 (<0.001)  |
| Zhuzhou   | 0.116 (<0.001)                             | 0.049 (0.036)    | 0.140 (<0.001)  | -0.124 (<0.001) | -0.139 (<0.001) | 0.102 (<0.001)  |
| Shaoyang  | 0.088 (<0.001)                             | 0.044 (0.061)    | 0.168 (<0.001)  | -0.094 (<0.001) | -0.054 (0.02)   | 0.037 (0.113)   |
| Yueyang   | 0.066 (0.005)                              | 0.033 (0.156)    | 0.187 (<0.001)  | -0.147 (<0.001) | -0.157 (<0.001) | 0.061 (0.009)   |
| Chenzhou  | -0.025 (0.29)                              | -0.095 (<0.001)  | 0.049 (0.037)   | -0.154 (<0.001) | -0.127 (<0.001) | -0.169 (<0.001) |
| Yongzhou  | -0.00004 (0.999)                           | -0.024 (0.299)   | 0.116 (<0.001)  | -0.231 (<0.001) | -0.086 (<0.001) | 0.030 (0.196)   |
| Huaihua   | 0.076 (0.001)                              | -0.002 (0.922)   | 0.126 (<0.001)  | -0.085 (<0.001) | -0.103 (<0.001) | -0.143 (<0.001) |
| Loudi     | 0.096 (<0.001)                             | 0.102 (<0.001)   | 0.155 (<0.001)  | -0.224 (<0.001) | -0.162 (<0.001) | -0.138 (<0.001) |
| Guangzhou | 0.009 (0.694)                              | 0.041 (0.08)     | 0.109 (<0.001)  | -0.170 (<0.001) | -0.093 (<0.001) | 0.089 (<0.001)  |
| Shaoguan  | 0.012 (0.601)                              | -0.021 (0.374)   | 0.108 (<0.001)  | -0.106 (<0.001) | -0.159 (<0.001) | 0.061 (0.009)   |
| Shenzhen  | -0.028 (0.226)                             | -0.005 (0.845)   | -0.022 (0.345)  | -0.324 (<0.001) | -0.083 (<0.001) | -0.166 (<0.001) |
| Zhuhai    | -0.072 (0.002)                             | -0.072 (0.002)   | 0.034 (0.151)   | -0.189 (<0.001) | -0.115 (<0.001) | -0.070 (0.003)  |
| Foshan    | 0.015 (0.53)                               | 0.090 (<0.001)   | 0.143 (<0.001)  | -0.107 (<0.001) | -0.107 (<0.001) | 0.165 (<0.001)  |
| Jiangmen  | -0.028 (0.232)                             | 0.001 (0.97)     | 0.079 (<0.001)  | -0.244 (<0.001) | -0.129 (<0.001) | 0.029 (0.221)   |
| Zhaoqing  | -0.056 (0.016)                             | -0.055 (0.02)    | 0.061 (0.009)   | -0.231 (<0.001) | -0.077 (<0.001) | -0.084 (<0.001) |
| Huizhou   | 0.057 (0.014)                              | 0.024 (0.316)    | 0.168 (<0.001)  | -0.043 (0.068)  | -0.14 (<0.001)  | 0.069 (0.003)   |
| Shanwei   | -0.187 (<0.001)                            | -0.176 (<0.001)  | -0.163 (<0.001) | -0.139 (<0.001) | -0.137 (<0.001) | -0.212 (<0.001) |
| Heyuan    | -0.002 (0.919)                             | -0.008 (0.723)   | 0.143 (<0.001)  | -0.061 (0.009)  | -0.116 (<0.001) | 0.178 (<0.001)  |
| Yangjiang | 0.061 (0.009)                              | 0.023 (0.334)    | 0.051 (0.028)   | -0.030 (0.195)  | -0.069 (0.003)  | -0.067 (0.004)  |
| Qingyuan  | 0.122 (<0.001)                             | 0.128 (<0.001)   | 0.173 (<0.001)  | -0.115 (<0.001) | -0.117 (<0.001) | 0.028 (0.229)   |
| Dongguan  | 0.076 (0.001)                              | 0.083 (<0.001)   | 0.187 (<0.001)  | -0.047 (0.044)  | -0.071 (0.003)  | 0.043 (0.067)   |
| Zhongshan | 0.09 (<0.001)                              | 0.067 (0.004)    | 0.200 (<0.001)  | -0.145 (<0.001) | -0.142 (<0.001) | 0.051 (0.03)    |
| Nanning   | 0.038 (0.103)                              | 0.031 (0.192)    | 0.072 (0.002)   | -0.023 (0.33)   | -0.080 (<0.001) | 0.053 (0.023)   |
| Chongqing | 0.093 (<0.001)                             | 0.073 (0.002)    | 0.062 (0.008)   | -0.127 (<0.001) | -0.192 (<0.001) | 0.018 (0.441)   |
| Chengdu   | 0.027 (0.255)                              | -0.009 (0.713)   | -0.035 (0.133)  | -0.230 (<0.001) | -0.221 (<0.001) | -0.113 (<0.001) |
| Guiyang   | 0.102 (<0.001)                             | 0.077 (0.001)    | 0.051 (0.029)   | 0.147 (<0.001)  | -0.091 (<0.001) | 0.160 (<0.001)  |
| Kunming   | 0.101 (<0.001)                             | 0.010 (0.662)    | 0.135 (<0.001)  | -0.089 (<0.001) | 0.054 (0.022)   | -0.030 (0.195)  |
| Xian      | 0.146 (<0.001)                             | 0.078 (<0.001)   | 0.150 (<0.001)  | -0.037 (0.118)  | -0.196 (<0.001) | -0.068 (0.003)  |
| Hanzhong  | 0.185 (<0.001)                             | 0.135 (<0.001)   | 0.135 (<0.001)  | 0.049 (0.035)   | -0.223 (<0.001) | 0.140 (<0.001)  |
| Tianshui  | 0.240 (<0.001)                             | 0.223 (<0.001)   | 0.319 (<0.001)  | 0.244 (<0.001)  | -0.281 (<0.001) | 0.301 (<0.001)  |
| Dingxi    | 0.205 (<0.001)                             | 0.125 (<0.001)   | 0.201 (<0.001)  | 0.150 (<0.001)  | -0.274 (<0.001) | 0.189 (<0.001)  |

Note: PM, particulate matter; SO<sub>2</sub>, sulfur dioxide; NO<sub>2</sub>, nitrogen dioxide; O<sub>3</sub>, ozone; CO, carbon monoxide.

**Table S8.** Pooled estimates of lag-specific risk ratios and 95% confidence intervals for influenza per 10 $\mu\text{g}/\text{m}^3$  increase in the concentration of each air pollutant based on the single-pollutant models.

| Air pollutant     | Lag-specific risk ratio per 10 $\mu\text{g}/\text{m}^3$ |                        |                        |                        |                         |                        |                        |
|-------------------|---------------------------------------------------------|------------------------|------------------------|------------------------|-------------------------|------------------------|------------------------|
|                   | lag day 1                                               | lag day 2              | lag day 3              | lag day 4              | lag day 5               | lag day 6              | lag day 7              |
| PM <sub>2.5</sub> | 1.0067 (1.0042-1.0091)                                  | 1.0052 (1.0035-1.0068) | 1.0034 (1.0022-1.0047) | 1.0022 (1.0009-1.0036) | 1.0019 (1.0005-1.0033)  | 1.0016 (0.9999-1.0033) | 1.0019 (0.9995-1.0043) |
| PM <sub>10</sub>  | 1.0045 (1.0027-1.0064)                                  | 1.0036 (1.0024-1.0047) | 1.0023 (1.0015-1.0032) | 1.0014 (1.0006-1.0023) | 1.0013 (1.0004-1.0022)  | 1.0012 (1.0001-1.0024) | 1.0014 (0.9997-1.0031) |
| SO <sub>2</sub>   | 1.0183 (1.0062-1.0306)                                  | 1.0162 (1.0077-1.0248) | 1.0121 (1.0058-1.0185) | 1.0091 (1.0031-1.015)  | 1.0087 (1.0034-1.014)   | 1.0085 (1.0035-1.0135) | 1.0084 (1.0007-1.0161) |
| NO <sub>2</sub>   | 1.0183 (1.0122-1.0245)                                  | 1.0147 (1.0105-1.0189) | 1.0107 (1.0074-1.014)  | 1.0086 (1.0053-1.0119) | 1.0089 (1.0057-1.0122)  | 1.0109 (1.0069-1.0148) | 1.0129 (1.0073-1.0185) |
| O <sub>3</sub>    | 1.0033 (1.0015-1.0052)                                  | 1.0023 (1.001-1.0036)  | 1.0014 (1.0001-1.0026) | 1.0006 (0.9993-1.0019) | 1.0000 (0.9989- 1.0011) | 0.9996 (0.9985-1.0007) | 0.9993 (0.9977-1.001)  |
| CO                | 1.0005 (1.0003-1.0008)                                  | 1.0004 (1.0003-1.0006) | 1.0003 (1.0002-1.0004) | 1.0003 (1.0001-1.0004) | 1.0003 (1.0001-1.0004)  | 1.0003 (1.0002-1.0005) | 1.0004 (1.0001-1.0006) |

Note: PM, particulate matter; SO<sub>2</sub>, sulfur dioxide; NO<sub>2</sub>, nitrogen dioxide; O<sub>3</sub>, ozone; CO, carbon monoxide.

**Table S9. City-specific attributable fractions of the air pollutants on influenza based on the single-pollutant model, China 2015–2019.**

| City         | Latitude (°N) | Attributable fractions (95% confidence interval) |                        |                        |                        |                       |                        |
|--------------|---------------|--------------------------------------------------|------------------------|------------------------|------------------------|-----------------------|------------------------|
|              |               | PM <sub>2.5</sub>                                | PM <sub>10</sub>       | NO <sub>2</sub>        | SO <sub>2</sub>        | O <sub>3</sub>        | CO                     |
| Zhangjiakou  | 40.87         | 7.03% (4.43%,9.53%)                              | 11.92% (7.58%,15.97%)  | 20.14% (15.32%,24.63%) | 16.26% (10.07%,21.82%) | 5.81% (-0.41%,11.57%) | 18.97% (13.07%,24.37%) |
| Beijing      | 40.19         | 10.52% (6.75%,14.02%)                            | 11.93% (7.57%,16%)     | 32.12% (24.99%,38.43%) | 6.83% (4.09%,9.44%)    | 3.81% (-0.26%,7.66%)  | 20.87% (14.56%,26.52%) |
| Datong       | 39.90         | 8.73% (5.52%,11.8%)                              | 12.91% (8.19%,17.32%)  | 22.86% (17.43%,27.87%) | 30.66% (19.85%,39.51%) | 4.98% (-0.35%,9.97%)  | 34.45% (24.63%,42.78%) |
| Tianjin      | 39.31         | 13.05% (8.41%,17.32%)                            | 13.57% (8.64%,18.14%)  | 38.07% (29.8%,45.26%)  | 12.64% (7.71%,17.18%)  | 3.22% (-0.22%,6.49%)  | 28.02% (19.77%,35.23%) |
| Baoding      | 39.03         | 17.42% (11.36%,22.86%)                           | 19.63% (12.72%,25.82%) | 37.28% (29.26%,44.22%) | 18.70% (11.67%,24.9%)  | 4.16% (-0.29%,8.3%)   | 30.11% (21.61%,37.31%) |
| Cangzhou     | 38.27         | 14.80% (9.54%,19.62%)                            | 17.12% (10.99%,22.7%)  | 34.07% (26.50%,40.74%) | 23.59% (14.85%,31.16%) | 5.2% (-0.36%,10.34%)  | 26.78% (18.89%,33.70%) |
| Shijiazhuang | 38.14         | 17.88% (11.69%,23.41%)                           | 21.42% (13.95%,28.04%) | 38.03% (29.88%,45.07%) | 22.07% (14.04%,28.92%) | 4.59% (-0.32%,9.12%)  | 30.91% (22.19%,38.31%) |
| Hengshui     | 37.77         | 17.48% (11.37%,22.98%)                           | 20.55% (13.35%,26.96%) | 32.39% (25.16%,38.79%) | 18.87% (11.79%,25.10%) | 5.11% (-0.36%,10.18%) | 29.02% (20.60%,36.30%) |
| Dezhou       | 37.26         | 16.07% (10.41%,21.21%)                           | 19.95% (12.90%,26.27%) | 30.65% (23.72%,36.85%) | 20.65% (12.97%,27.34%) | 5.79% (-0.41%,11.49%) | 30.80% (21.88%,38.49%) |
| Xingtai      | 37.22         | 18.27% (11.94%,23.92%)                           | 22.05% (14.35%,28.87%) | 38.84% (30.52%,46.03%) | 26.59% (17.11%,34.50%) | 5.04% (-0.35%,10.01%) | 35.13% (25.36%,43.28%) |
| Handan       | 36.55         | 17.41% (11.34%,22.87%)                           | 22.07% (14.38%,28.88%) | 34.49% (26.91%,41.15%) | 24.91% (15.98%,32.38%) | 5.70% (-0.40%,11.30%) | 33.02% (23.76%,40.83%) |
| Liaocheng    | 36.47         | 17.94% (11.64%,23.63%)                           | 21.60% (13.99%,28.40%) | 33.44% (25.99%,40.04%) | 17.74% (10.97%,23.81%) | 4.92% (-0.34%,9.81%)  | 28.55% (20.11%,35.93%) |
| Linfen       | 36.23         | 17.49% (11.42%,22.92%)                           | 19.52% (12.64%,25.68%) | 31.31% (24.29%,37.56%) | 39.69% (28.15%,48.05%) | 4.78% (-0.33%,9.54%)  | 44.36% (32.84%,53.46%) |
| Anyang       | 35.88         | 19.12% (12.54%,24.96%)                           | 21.21% (13.78%,27.82%) | 34.59% (26.95%,41.32%) | 20.89% (13.21%,27.53%) | 5.10% (-0.36%,10.14%) | 36.67% (26.53%,45.10%) |
| Jincheng     | 35.62         | 14.82% (9.54%,19.66%)                            | 18.98% (12.21%,25.12%) | 31.75% (24.60%,38.13%) | 29.95% (19.88%,37.93%) | 5.66% (-0.40%,11.26%) | 37.63% (27.24%,46.21%) |
| Xinxiang     | 35.27         | 16.13% (10.46%,21.28%)                           | 19.01% (12.26%,25.09%) | 35.86% (28.04%,42.71%) | 19.97% (12.50%,26.52%) | 5.48% (-0.38%,10.88%) | 30.49% (21.69%,38.05%) |
| Heze         | 35.16         | 16.87% (10.93%,22.26%)                           | 20.97% (13.56%,27.62%) | 28.93% (22.29%,34.92%) | 18.35% (11.40%,24.53%) | 6.08% (-0.43%,12.07%) | 30.58% (21.64%,38.34%) |
| Dingxi       | 35.12         | 9.64% (6.09%,13.02%)                             | 14.09% (8.99%,18.82%)  | 23.41% (17.85%,28.55%) | 19.20% (12.03%,25.47%) | 5.30% (-0.37%,10.61%) | 20.23% (13.98%,25.92%) |
| Tianshui     | 34.65         | 10.23% (6.49%,13.76%)                            | 13.92% (8.86%,18.60%)  | 29.46% (22.72%,35.52%) | 21.15% (13.39%,27.79%) | 5.02% (-0.35%,10.06%) | 23.63% (16.48%,30.01%) |
| Luoyang      | 34.30         | 16.94% (10.99%,22.33%)                           | 20.29% (13.08%,26.79%) | 33.50% (25.98%,40.18%) | 11.56% (7.00%,15.81%)  | 4.71% (-0.33%,9.41%)  | 22.86% (15.91%,29.11%) |
| Shangqiu     | 34.29         | 14.92% (9.60%,19.81%)                            | 17.67% (11.32%,23.46%) | 25.79% (19.79%,31.26%) | 13.49% (8.27%,18.27%)  | 6.24% (-0.44%,12.38%) | 20.76% (14.32%,26.65%) |
| Xian         | 34.12         | 19.21% (12.52%,25.19%)                           | 21.15% (13.67%,27.87%) | 42.19% (33.26%,49.83%) | 12.87% (7.80%,17.59%)  | 3.12% (-0.22%,6.31%)  | 27.96% (19.65%,35.25%) |
| Pingdingshan | 33.80         | 16.77% (10.83%,22.18%)                           | 18.01% (11.56%,23.89%) | 30.46% (23.50%,36.72%) | 17.18% (10.64%,23.03%) | 5.24% (-0.37%,10.43%) | 26.67% (18.60%,33.87%) |
| Zhoukou      | 33.73         | 14.66% (9.45%,19.43%)                            | 17.29% (11.10%,22.94%) | 22.51% (17.14%,27.47%) | 13.72% (8.35%,18.68%)  | 6.25% (-0.44%,12.4%)  | 29.18% (20.62%,36.63%) |
| Hanzhong     | 33.10         | 17.30% (11.16%,22.91%)                           | 16.51% (10.52%,22.02%) | 27.42% (21.03%,33.24%) | 12.27% (7.42%,16.80%)  | 2.99% (-0.21%,6.03%)  | 35.25% (25.13%,43.86%) |
| Nanyang      | 33.05         | 14.16% (9.11%,18.82%)                            | 17.11% (10.97%,22.70%) | 24.45% (18.70%,29.72%) | 12.06% (7.33%,16.44%)  | 6.20% (-0.43%,12.30%) | 27.14% (18.97%,34.38%) |
| Zhumadian    | 32.93         | 14.07% (9.04%,18.72%)                            | 16.81% (10.76%,22.34%) | 26.33% (20.21%,31.90%) | 15.43% (9.61%,20.6%)   | 6.31% (-0.44%,12.51%) | 21.06% (14.55%,26.98%) |
| Fuyang       | 32.92         | 14.35% (9.21%,19.11%)                            | 15.26% (9.72%,20.39%)  | 26.08% (19.98%,31.65%) | 11.29% (6.87%,15.38%)  | 5.22% (-0.36%,10.42%) | 20.64% (14.24%,26.50%) |
| Chuzhou      | 32.55         | 13.59% (8.69%,18.15%)                            | 13.89% (8.81%,18.62%)  | 29.53% (22.84%,35.52%) | 10.35% (6.21%,14.28%)  | 5.49% (-0.38%,10.95%) | 21.02% (14.49%,26.99%) |
| Xinyang      | 32.09         | 12.88% (8.25%,17.18%)                            | 14.67% (9.35%,19.59%)  | 21.84% (16.65%,26.63%) | 8.89% (5.34%,12.26%)   | 6.36% (-0.45%,12.62%) | 19.09% (13.13%,24.56%) |
| Nanjing      | 31.94         | 11.26% (7.16%,15.11%)                            | 12.91% (8.18%,17.34%)  | 33.83% (26.29%,40.49%) | 10.52% (6.33%,14.47%)  | 5.17% (-0.36%,10.32%) | 22.88% (15.82%,29.29%) |
| Hefei        | 31.77         | 12.95% (8.27%,17.33%)                            | 12.59% (7.96%,16.94%)  | 33.78% (26.28%,40.42%) | 7.60% (4.55%,10.51%)   | 4.71% (-0.33%,9.42%)  | 21.80% (15.04%,27.98%) |
| Luan         | 31.76         | 10.95% (6.95%,14.73%)                            | 12.58% (7.95%,16.93%)  | 26.35% (20.23%,31.92%) | 7.54% (4.50%,10.46%)   | 5.47% (-0.38%,10.91%) | 18.68% (12.79%,24.15%) |
| Maanshan     | 31.64         | 12.91% (8.26%,17.25%)                            | 13.11% (8.30%,17.60%)  | 30.78% (23.82%,37.00%) | 14.66% (8.94%,19.93%)  | 5.10% (-0.36%,10.18%) | 27.12% (18.94%,34.40%) |
| Wuxi         | 31.53         | 12.52% (7.99%,16.77%)                            | 14.12% (8.97%,18.91%)  | 34.41% (26.80%,41.12%) | 9.88% (5.95%,13.6%)    | 4.35% (-0.03%,8.73%)  | 25.78% (17.93%,32.81%) |
| Shanghai     | 31.18         | 9.98% (6.33%,13.43%)                             | 9.23% (5.79%,12.50%)   | 34.51% (26.91%,41.19%) | 9.12% (5.48%,12.56%)   | 5.50% (-0.38%,10.97%) | 19.25% (13.21%,24.83%) |
| Huanggang    | 30.73         | 11.76% (7.48%,15.79%)                            | 13.42% (8.49%,18.03%)  | 24.28% (18.60%,29.48%) | 8.27% (4.96%,11.42%)   | 4.66% (-0.32%,9.33%)  | 23.52% (16.26%,30.11%) |
| Chengdu      | 30.70         | 12.23% (7.78%,16.4%)                             | 13.08% (8.27%,17.58%)  | 33.94% (26.30%,40.73%) | 6.44% (3.82%,8.98%)    | 3.52% (-0.24%,7.09%)  | 21.14% (14.54%,27.2%)  |
| Wuhan        | 30.63         | 13.67% (8.73%,18.28%)                            | 13.80% (8.74%,18.52%)  | 36.80% (28.81%,43.77%) | 8.90% (5.33%,12.31%)   | 3.88% (-0.27%,7.78%)  | 25.95% (18.04%,33.04%) |
| Chizhou      | 30.30         | 11.22% (7.15%,15.05%)                            | 11.41% (7.21%,15.36%)  | 28.82% (22.22%,34.76%) | 11.79% (7.15%,16.12%)  | 4.67% (-0.32%,9.33%)  | 20.56% (14.15%,26.44%) |
| Enshi        | 30.20         | 10.12% (6.42%,13.6%)                             | 11.03% (6.95%,14.88%)  | 20.67% (15.67%,25.35%) | 4.87% (2.89%,6.8%)     | 3.41% (-0.24%,6.88%)  | 22.93% (15.86%,29.35%) |



Table S9. (continued).

| City      | Latitude (°N) | Attributable fractions (95% confidence interval) |                        |                        |                        |                       |                        |
|-----------|---------------|--------------------------------------------------|------------------------|------------------------|------------------------|-----------------------|------------------------|
|           |               | PM <sub>2.5</sub>                                | PM <sub>10</sub>       | NO <sub>2</sub>        | SO <sub>2</sub>        | O <sub>3</sub>        | CO                     |
| Chongqing | 30.07         | 11.49% (7.30%,15.43%)                            | 11.97% (7.56%,16.12%)  | 32.90% (25.45%,39.55%) | 7.89% (4.71%,10.95%)   | 2.70% (-0.19%,5.43%)  | 23.56% (16.28%,30.17%) |
| Jingzhou  | 30.01         | 14.41% (9.23%,19.21%)                            | 17.03% (10.90%,22.64%) | 28.42% (21.88%,34.34%) | 11.83% (7.16%,16.19%)  | 4.36% (-0.30%,8.73%)  | 28.21% (19.73%,35.72%) |
| Huangshan | 29.92         | 6.71% (4.22%,9.11%)                              | 7.44% (4.64%,10.12%)   | 15.95% (11.98%,19.71%) | 8.04% (4.79%,11.15%)   | 4.44% (-0.31%,8.93%)  | 17.10% (11.68%,22.15%) |
| Hangzhou  | 29.90         | 10.82% (6.86%,14.55%)                            | 12.15% (7.68%,16.35%)  | 34.77% (27.03%,41.61%) | 7.47% (4.45%,10.38%)   | 3.99% (-0.28%,8.00%)  | 22.02% (15.17%,28.29%) |
| Shaoxing  | 29.72         | 10.82% (6.87%,14.56%)                            | 11.65% (7.36%,15.70%)  | 31.11% (24.06%,37.42%) | 7.90% (4.73%,10.93%)   | 4.32% (-0.30%,8.67%)  | 21.40% (14.73%,27.51%) |
| Ningbo    | 29.71         | 8.85% (5.60%,11.94%)                             | 9.57% (6.01%,12.94%)   | 31.5% (24.4%,37.83%)   | 8.20% (4.90%,11.37%)   | 5.03% (-0.35%,10.06%) | 20.40% (14.00%,26.28%) |
| Jinhua    | 29.12         | 8.98% (5.67%,12.13%)                             | 9.55% (6.00%,12.92%)   | 31.78% (24.61%,38.17%) | 9.12% (5.48%,12.58%)   | 3.88% (-0.27%,7.79%)  | 20.91% (14.38%,26.92%) |
| Yueyang   | 29.07         | 12.05% (7.65%,16.2%)                             | 12.58% (7.94%,16.94%)  | 26.51% (20.37%,32.09%) | 8.62% (5.16%,11.93%)   | 4.30% (-0.30%,8.62%)  | 26.03% (18.08%,33.18%) |
| Shangrao  | 28.78         | 8.70% (5.48%,11.79%)                             | 10.17% (6.39%,13.77%)  | 21.71% (16.54%,26.49%) | 23.45% (14.89%,30.73%) | 5.33% (-0.37%,10.63%) | 19.57% (13.44%,25.21%) |
| Taizhou   | 28.78         | 7.65% (4.81%,10.36%)                             | 9.16% (5.75%,12.41%)   | 21.04% (15.99%,25.72%) | 5.18% (3.07%,7.23%)    | 5.28% (-0.37%,10.56%) | 16.83% (11.48%,21.82%) |
| Nanchang  | 28.65         | 9.54% (6.04%,12.87%)                             | 11.94% (7.55%,16.07%)  | 28.63% (22.09%,34.51%) | 9.67% (5.84%,13.27%)   | 4.44% (-0.31%,8.89%)  | 24.72% (17.15%,31.55%) |
| Yingtian  | 28.24         | 9.23% (5.84%,12.47%)                             | 9.20% (5.77%,12.46%)   | 20.92% (15.90%,25.57%) | 19.71% (12.30%,26.25%) | 5.14% (-0.36%,10.25%) | 16.96% (11.57%,21.98%) |
| Changsha  | 28.23         | 13.81% (8.85%,18.41%)                            | 11.01% (6.94%,14.85%)  | 29.99% (23.18%,36.09%) | 7.42% (4.44%,10.27%)   | 4.06% (-0.28%,8.15%)  | 24.28% (16.80%,31.05%) |
| Lishui    | 28.20         | 6.95% (4.36%,9.43%)                              | 7.75% (4.84%,10.54%)   | 23.32% (17.77%,28.45%) | 5.76% (3.42%,8.04%)    | 4.07% (-0.28%,8.18%)  | 20.06% (13.77%,25.87%) |
| Loudi     | 27.74         | 10.5% (6.66%,14.14%)                             | 12.38% (7.84%,16.63%)  | 21.15% (16.09%,25.85%) | 9.82% (5.92%,13.47%)   | 4.95% (-0.34%,9.91%)  | 28.97% (20.36%,36.54%) |
| Huaihua   | 27.56         | 9.75% (6.18%,13.14%)                             | 11.92% (7.52%,16.05%)  | 17.00% (12.85%,20.89%) | 9.67% (5.85%,13.24%)   | 4.75% (-0.33%,9.55%)  | 23.57% (16.29%,30.17%) |
| Zhuzhou   | 27.12         | 13.06% (8.36%,17.42%)                            | 12.84% (8.15%,17.22%)  | 30.39% (23.49%,36.56%) | 11.84% (7.18%,16.20%)  | 4.12% (-0.29%,8.25%)  | 22.21% (15.32%,28.49%) |
| Jian      | 26.98         | 9.39% (5.93%,12.69%)                             | 10.58% (6.65%,14.31%)  | 19.14% (14.52%,23.45%) | 16.73% (10.25%,22.64%) | 5.11% (-0.36%,10.22%) | 20.26% (13.92%,26.10%) |
| Shaoyang  | 26.92         | 12.54% (8.02%,16.76%)                            | 11.97% (7.58%,16.09%)  | 22.09% (16.85%,26.93%) | 17.07% (10.51%,22.99%) | 5.10% (-0.35%,10.21%) | 22.85% (15.79%,29.28%) |
| Guiyang   | 26.84         | 8.08% (5.09%,10.96%)                             | 9.31% (5.84%,12.63%)   | 20.61% (15.63%,25.26%) | 12.88% (7.85%,17.52%)  | 4.55% (-0.32%,9.13%)  | 18.44% (12.61%,23.85%) |
| Fuzhou    | 26.06         | 6.09% (3.82%,8.30%)                              | 7.75% (4.83%,10.55%)   | 22.64% (17.24%,27.63%) | 5.11% (3.02%,7.14%)    | 5.18% (-0.36%,10.37%) | 17.55% (11.97%,22.76%) |
| Chenzhou  | 25.82         | 7.35% (4.63%,9.96%)                              | 8.67% (5.44%,11.77%)   | 20.89% (15.88%,25.55%) | 9.77% (5.88%,13.46%)   | 4.35% (-0.30%,8.73%)  | 22.80% (15.77%,29.19%) |
| Yongzhou  | 25.78         | 9.44% (5.98%,12.7%)                              | 9.66% (6.08%,13.05%)   | 21.84% (16.64%,26.65%) | 8.37% (5.03%,11.54%)   | 4.91% (-0.34%,9.83%)  | 17.36% (11.87%,22.47%) |
| Ganzhou   | 25.71         | 8.46% (5.34%,11.44%)                             | 9.54% (5.99%,12.9%)    | 20.07% (15.26%,24.54%) | 14.02% (8.57%,19.01%)  | 4.97% (-0.35%,9.94%)  | 31.41% (22.11%,39.53%) |
| Kunming   | 25.39         | 6.66% (4.17%,9.07%)                              | 8.57% (5.35%,11.66%)   | 25.25% (19.26%,30.76%) | 11.89% (7.16%,16.36%)  | 5.36% (-0.37%,10.72%) | 21.30% (14.66%,27.39%) |
| Quanzhou  | 25.21         | 6.12% (3.83%,8.33%)                              | 7.90% (4.93%,10.76%)   | 20.33% (15.41%,24.92%) | 8.59% (5.14%,11.90%)   | 5.62% (-0.39%,11.23%) | 15.35% (10.44%,19.98%) |
| Shaoguan  | 24.83         | 7.35% (4.63%,9.97%)                              | 7.58% (4.74%,10.32%)   | 22.06% (16.79%,26.94%) | 11.88% (7.16%,16.31%)  | 4.63% (-0.32%,9.27%)  | 24.17% (16.73%,30.90%) |
| Qingyuan  | 24.32         | 8.89% (5.62%,12.00%)                             | 9.68% (6.09%,13.09%)   | 30.49% (23.63%,36.62%) | 9.87% (5.92%,13.63%)   | 4.74% (-0.33%,9.47%)  | 23.78% (16.48%,30.37%) |
| Heyuan    | 24.05         | 6.47% (4.06%,8.80%)                              | 7.24% (4.52%,9.87%)    | 19.19% (14.54%,23.54%) | 6.98% (4.15%,9.70%)    | 4.92% (-0.34%,9.87%)  | 22.38% (15.43%,28.74%) |
| Zhaoqing  | 23.54         | 7.68% (4.84%,10.40%)                             | 8.34% (5.22%,11.32%)   | 26.10% (20.09%,31.54%) | 10.09% (6.07%,13.91%)  | 5.31% (-0.37%,10.6%)  | 21.24% (14.61%,27.32%) |
| Guangzhou | 23.37         | 7.66% (4.82%,10.38%)                             | 8.94% (5.61%,12.13%)   | 35.63% (27.86%,42.43%) | 7.75% (4.63%,10.76%)   | 4.93% (-0.34%,9.84%)  | 22.36% (15.43%,28.69%) |
| Huizhou   | 23.25         | 6.27% (3.93%,8.53%)                              | 7.74% (4.83%,10.54%)   | 20.58% (15.62%,25.19%) | 7.28% (4.33%,10.13%)   | 5.21% (-0.36%,10.43%) | 18.83% (12.89%,24.34%) |
| Nanning   | 23.05         | 8.28% (5.22%,11.21%)                             | 9.84% (6.18%,13.33%)   | 27.10% (20.84%,32.79%) | 9.53% (5.72%,13.16%)   | 4.23% (-0.29%,8.50%)  | 23.07% (15.93%,29.57%) |
| Shanwei   | 23.03         | 4.66% (2.91%,6.36%)                              | 5.69% (3.53%,7.80%)    | 9.13% (6.80%,11.39%)   | 6.92% (4.11%,9.64%)    | 5.50% (-0.38%,10.99%) | 17.56% (11.98%,22.77%) |
| Foshan    | 23.02         | 7.88% (4.97%,10.68%)                             | 9.84% (6.18%,13.31%)   | 32.95% (25.66%,39.40%) | 9.32% (5.59%,12.88%)   | 4.78% (-0.33%,9.54%)  | 22.34% (15.41%,28.66%) |
| Dongguan  | 22.95         | 8.28% (5.22%,11.21%)                             | 8.65% (5.41%,11.75%)   | 30.49% (23.61%,36.63%) | 9.31% (5.57%,12.87%)   | 5.82% (-0.41%,11.58%) | 20.51% (14.09%,26.42%) |
| Shenzhen  | 22.66         | 5.75% (3.60%,7.84%)                              | 6.9% (4.30%,9.41%)     | 22.34% (17.03%,27.24%) | 5.13% (3.04%,7.17%)    | 5.17% (-0.36%,10.34%) | 16.89% (11.51%,21.93%) |
| Zhongshan | 22.52         | 7.32% (4.62%,9.91%)                              | 7.68% (4.81%,10.45%)   | 27.65% (21.48%,33.13%) | 7.04% (4.20%,9.77%)    | 4.37% (-0.30%,8.74%)  | 21.45% (14.80%,27.52%) |
| Jiangmen  | 22.28         | 6.91% (4.35%,9.38%)                              | 8.52% (5.34%,11.56%)   | 26.19% (20.24%,31.55%) | 7.47% (4.46%,10.36%)   | 4.89% (-0.34%,9.74%)  | 20.85% (14.37%,26.79%) |
| Zhuhai    | 22.17         | 5.62% (3.53%,7.65%)                              | 6.46% (4.03%,8.8%)     | 23.18% (17.78%,28.10%) | 5.45% (3.23%,7.60%)    | 5.04% (-0.35%,10.08%) | 17.42% (11.90%,22.57%) |
| Yangjiang | 22.04         | 7.03% (4.43%,9.53%)                              | 7.27% (4.53%,9.9%)     | 15.75% (11.91%,19.35%) | 6.43% (3.83%,8.93%)    | 5.15% (-0.36%,10.28%) | 22.08% (15.21%,28.35%) |

Note: PM, particulate matter; SO<sub>2</sub>, sulfur dioxide; NO<sub>2</sub>, nitrogen dioxide; O<sub>3</sub>, ozone; CO, carbon monoxide.

**Table S10. City-specific attributable fractions of the air pollutants on influenza based on the multi-pollutant model, China 2015–2019.**

| City         | Latitude (°N) | Attributable fractions (95% confidence interval) |                         |                        |                         |                       |                        |
|--------------|---------------|--------------------------------------------------|-------------------------|------------------------|-------------------------|-----------------------|------------------------|
|              |               | PM <sub>2.5</sub>                                | PM <sub>10</sub>        | NO <sub>2</sub>        | SO <sub>2</sub>         | O <sub>3</sub>        | CO                     |
| Zhangjiakou  | 40.87         | 1.15% (-4.89%,6.68%)                             | -2.39% (-13.65%,6.89%)  | 19.54% (13.35%,25.18%) | -0.11% (-5.14%,4.53%)   | -0.47% (-6.65%,5.29%) | 4.82% (-1.15%,10.34%)  |
| Beijing      | 40.19         | 1.79% (-8.03%,10.03%)                            | -2.37% (-13.09%,6.88%)  | 31.25% (21.98%,39.19%) | -0.04% (-1.93%,1.79%)   | -0.30% (-4.28%,3.47%) | 5.47% (-1.33%,11.59%)  |
| Datong       | 39.90         | 1.44% (-6.18%,8.31%)                             | -2.56% (-14.14%,7.45%)  | 22.18% (15.21%,28.48%) | -0.24% (-11.29%,9.30%)  | -0.40% (-5.65%,4.54%) | 9.54% (-2.37%,19.81%)  |
| Tianjin      | 39.31         | 2.24% (-10.11%,12.44%)                           | -2.72% (-15.13%,7.86%)  | 37.06% (26.27%,46.11%) | -0.08% (-3.81%,3.43%)   | -0.26% (-3.59%,2.93%) | 7.52% (-1.84%,15.81%)  |
| Baoding      | 39.03         | 3.08% (-14.36%,16.64%)                           | -4.17% (-24.23%,11.60%) | 36.30% (25.83%,45.05%) | -0.13% (-6.09%,5.30%)   | -0.33% (-4.73%,3.79%) | 8.45% (-2.12%,17.43%)  |
| Cangzhou     | 38.27         | 2.55% (-11.51%,14.11%)                           | -3.53% (-19.97%,10.01%) | 33.14% (23.31%,41.55%) | -0.17% (-7.88%,6.78%)   | -0.42% (-5.97%,4.74%) | 7.19% (-1.76%,15.10%)  |
| Shijiazhuang | 38.14         | 3.18% (-14.99%,17.08%)                           | -4.63% (-27.27%,12.73%) | 37.04% (26.38%,45.91%) | -0.16% (-7.71%,6.48%)   | -0.37% (-5.28%,4.18%) | 8.68% (-2.18%,17.90%)  |
| Hengshui     | 37.77         | 3.07% (-14.28%,16.68%)                           | -4.41% (-25.85%,12.19%) | 31.50% (22.12%,39.56%) | -0.13% (-6.15%,5.35%)   | -0.41% (-5.86%,4.66%) | 7.92% (-1.96%,16.53%)  |
| Dezhou       | 37.26         | 2.80% (-12.83%,15.34%)                           | -4.21% (-24.37%,11.77%) | 29.80% (20.81%,37.60%) | -0.15% (-6.86%,5.91%)   | -0.47% (-6.70%,5.28%) | 8.44% (-2.10%,17.57%)  |
| Xingtai      | 37.22         | 3.24% (-15.22%,17.45%)                           | -4.75% (-27.83%,13.10%) | 37.83% (26.94%,46.88%) | -0.20% (-9.68%,7.99%)   | -0.41% (-5.81%,4.60%) | 9.99% (-2.52%,20.51%)  |
| Handan       | 36.55         | 3.07% (-14.36%,16.62%)                           | -4.78% (-28.18%,13.13%) | 33.56% (23.69%,41.95%) | -0.19% (-8.94%,7.43%)   | -0.46% (-6.60%,5.20%) | 9.32% (-2.34%,19.19%)  |
| Liaocheng    | 36.47         | 3.13% (-14.39%,17.12%)                           | -4.58% (-26.43%,12.76%) | 32.53% (22.85%,40.84%) | -0.12% (-5.56%,4.93%)   | -0.40% (-5.63%,4.49%) | 7.63% (-1.87%,16.07%)  |
| Linfen       | 36.23         | 3.10% (-14.52%,16.70%)                           | -4.14% (-24.02%,11.53%) | 30.45% (21.33%,38.31%) | -0.42% (-24.19%,14.72%) | -0.39% (-5.47%,4.36%) | 13.44% (-3.49%,26.88%) |
| Anyang       | 35.88         | 3.43% (-16.28%,18.28%)                           | -4.55% (-26.59%,12.58%) | 33.66% (23.72%,42.13%) | -0.15% (-7.14%,6.07%)   | -0.41% (-5.88%,4.65%) | 10.49% (-2.65%,21.48%) |
| Jincheng     | 35.62         | 2.54% (-11.44%,14.13%)                           | -3.93% (-22.28%,11.12%) | 30.87% (21.60%,38.90%) | -0.25% (-12.41%,9.58%)  | -0.46% (-6.50%,5.16%) | 10.76% (-2.71%,22.06%) |
| Xinxiang     | 35.27         | 2.81% (-12.93%,15.39%)                           | -3.98% (-22.81%,11.17%) | 34.91% (24.70%,43.52%) | -0.14% (-6.57%,5.69%)   | -0.44% (-6.32%,5.00%) | 8.36% (-2.07%,17.42%)  |
| Heze         | 35.16         | 2.94% (-13.46%,16.10%)                           | -4.42% (-25.39%,12.36%) | 28.11% (19.52%,35.65%) | -0.13% (-5.85%,5.14%)   | -0.49% (-7.00%,5.54%) | 8.26% (-2.03%,17.33%)  |
| Dingxi       | 35.12         | 1.59% (-6.82%,9.17%)                             | -2.85% (-16.05%,8.18%)  | 22.72% (15.57%,29.19%) | -0.14% (-6.29%,5.47%)   | -0.42% (-6.00%,4.83%) | 5.17% (-1.24%,11.07%)  |
| Tianshui     | 34.65         | 1.70% (-7.38%,9.74%)                             | -2.80% (-15.57%,8.06%)  | 28.62% (19.91%,36.26%) | -0.15% (-7.20%,6.15%)   | -0.40% (-5.69%,4.58%) | 6.17% (-1.49%,13.11%)  |
| Luoyang      | 34.30         | 2.95% (-13.53%,16.17%)                           | -4.23% (-24.13%,11.92%) | 32.57% (22.82%,40.99%) | -0.07% (-3.39%,3.09%)   | -0.38% (-5.37%,4.30%) | 5.94% (-1.43%,12.64%)  |
| Shangqiu     | 34.29         | 2.56% (-11.49%,14.22%)                           | -3.62% (-20.40%,10.31%) | 25.05% (17.30%,31.93%) | -0.09% (-4.12%,3.69%)   | -0.50% (-7.20%,5.69%) | 5.28% (-1.26%,11.33%)  |
| Xian         | 34.12         | 3.39% (-15.77%,18.34%)                           | -4.45% (-25.50%,12.46%) | 41.11% (29.40%,50.73%) | -0.08% (-3.78%,3.45%)   | -0.25% (-3.48%,2.84%) | 7.44% (-1.81%,15.69%)  |
| Pingdingshan | 33.80         | 2.90% (-13.15%,16.00%)                           | -3.70% (-20.90%,10.53%) | 29.60% (20.60%,37.48%) | -0.12% (-5.44%,4.79%)   | -0.42% (-6.00%,4.77%) | 6.96% (-1.68%,14.80%)  |
| Zhoukou      | 33.73         | 2.52% (-11.41%,13.98%)                           | -3.55% (-20.10%,10.11%) | 21.84% (14.95%,28.08%) | -0.09% (-4.08%,3.70%)   | -0.51% (-7.21%,5.70%) | 7.86% (-1.93%,16.50%)  |
| Hanzhong     | 33.10         | 2.98% (-13.43%,16.50%)                           | -3.32% (-18.44%,9.58%)  | 26.63% (18.39%,33.95%) | -0.08% (-3.58%,3.27%)   | -0.24% (-3.34%,2.72%) | 9.69% (-2.39%,20.19%)  |
| Nanyang      | 33.05         | 2.42% (-10.88%,13.50%)                           | -3.51% (-19.80%,9.99%)  | 23.74% (16.34%,30.37%) | -0.08% (-3.57%,3.24%)   | -0.50% (-7.15%,5.65%) | 7.12% (-1.73%,15.10%)  |
| Zhumadian    | 32.93         | 2.40% (-10.75%,13.41%)                           | -3.43% (-19.31%,9.80%)  | 25.57% (17.68%,32.58%) | -0.11% (-5.00%,4.35%)   | -0.51% (-7.29%,5.75%) | 5.38% (-1.29%,11.53%)  |
| Fuyang       | 32.92         | 2.44% (-10.89%,13.68%)                           | -3.06% (-17.00%,8.84%)  | 25.32% (17.46%,32.33%) | -0.07% (-3.37%,3.05%)   | -0.42% (-5.96%,4.76%) | 5.25% (-1.26%,11.27%)  |
| Chuzhou      | 32.55         | 2.29% (-10.14%,12.94%)                           | -2.75% (-15.13%,8.01%)  | 28.71% (20.04%,36.25%) | -0.07% (-2.94%,2.72%)   | -0.44% (-6.28%,5.01%) | 5.34% (-1.28%,11.47%)  |
| Xinyang      | 32.09         | 2.18% (-9.70%,12.27%)                            | -2.95% (-16.39%,8.50%)  | 21.19% (14.52%,27.22%) | -0.06% (-2.53%,2.34%)   | -0.52% (-7.35%,5.80%) | 4.83% (-1.15%,10.38%)  |
| Nanjing      | 31.94         | 1.88% (-8.23%,10.72%)                            | -2.54% (-13.95%,7.43%)  | 32.90% (23.12%,41.29%) | -0.07% (-3.02%,2.78%)   | -0.42% (-5.91%,4.72%) | 5.85% (-1.40%,12.53%)  |
| Hefei        | 31.77         | 2.18% (-9.58%,12.34%)                            | -2.46% (-13.42%,7.23%)  | 32.86% (23.10%,41.22%) | -0.05% (-2.14%,1.99%)   | -0.38% (-5.36%,4.29%) | 5.54% (-1.33%,11.90%)  |
| Luan         | 31.76         | 1.82% (-7.92%,10.42%)                            | -2.46% (-13.42%,7.22%)  | 25.59% (17.70%,32.60%) | -0.05% (-2.11%,1.96%)   | -0.44% (-6.24%,4.98%) | 4.67% (-1.11%,10.09%)  |
| Maanshan     | 31.64         | 2.18% (-9.66%,12.30%)                            | -2.58% (-14.16%,7.55%)  | 29.92% (20.90%,37.76%) | -0.10% (-4.39%,3.97%)   | -0.41% (-5.82%,4.65%) | 7.10% (-1.72%,15.08%)  |
| Wuxi         | 31.53         | 2.10% (-9.24%,11.93%)                            | -2.81% (-15.47%,8.15%)  | 33.48% (23.58%,41.92%) | -0.06% (-2.84%,2.61%)   | -0.35% (-4.91%,3.96%) | 6.68% (-1.61%,14.25%)  |
| Shanghai     | 31.18         | 1.66% (-7.20%,9.50%)                             | -1.77% (-9.49%,5.26%)   | 33.58% (23.69%,41.99%) | -0.06% (-2.61%,2.41%)   | -0.44% (-6.27%,5.01%) | 4.84% (-1.15%,10.43%)  |
| Huanggang    | 30.73         | 1.96% (-8.58%,11.20%)                            | -2.64% (-14.42%,7.72%)  | 23.57% (16.25%,30.11%) | -0.05% (-2.34%,2.17%)   | -0.37% (-5.3%,4.25%)  | 6.01% (-1.44%,12.88%)  |
| Chengdu      | 30.70         | 2.04% (-8.93%,11.64%)                            | -2.57% (-14.01%,7.52%)  | 33.00% (23.09%,41.55%) | -0.04% (-1.77%,1.66%)   | -0.28% (-3.94%,3.21%) | 5.34% (-1.27%,11.49%)  |
| Wuhan        | 30.63         | 2.30% (-10.15%,13.02%)                           | -2.72% (-14.9%,7.94%)   | 35.83% (25.40%,44.60%) | -0.06% (-2.51%,2.33%)   | -0.31% (-4.39%,3.54%) | 6.72% (-1.62%,14.33%)  |
| Chizhou      | 30.30         | 1.88% (-8.24%,10.68%)                            | -2.23% (-12.17%,6.55%)  | 28.00% (19.47%,35.48%) | -0.08% (-3.47%,3.16%)   | -0.37% (-5.30%,4.25%) | 5.20% (-1.24%,11.19%)  |
| Enshi        | 30.20         | 1.68% (-7.32%,9.63%)                             | -2.14% (-11.62%,6.32%)  | 20.05% (13.63%,25.93%) | -0.03% (-1.33%,1.25%)   | -0.27% (-3.81%,3.11%) | 5.87% (-1.41%,12.57%)  |

Table S10. (continued).

| City      | Latitude (°N) | Attributable fractions (95% confidence interval) |                        |                        |                       |                       |                       |
|-----------|---------------|--------------------------------------------------|------------------------|------------------------|-----------------------|-----------------------|-----------------------|
|           |               | PM <sub>2.5</sub>                                | PM <sub>10</sub>       | NO <sub>2</sub>        | SO <sub>2</sub>       | O <sub>3</sub>        | CO                    |
| Chongqing | 30.07         | 1.91% (-8.34%,10.94%)                            | -2.33% (-12.70%,6.87%) | 31.98% (22.32%,40.36%) | -0.05% (-2.20%,2.05%) | -0.22% (-3.03%,2.46%) | 6.01% (-1.44%,12.89%) |
| Jingzhou  | 30.01         | 2.44% (-10.86%,13.73%)                           | -3.47% (-19.44%,9.92%) | 27.61% (19.15%,35.06%) | -0.08% (-3.46%,3.16%) | -0.35% (-4.93%,3.97%) | 7.41% (-1.80%,15.72%) |
| Huangshan | 29.92         | 1.09% (-4.65%,6.38%)                             | -1.40% (-7.46%,4.21%)  | 15.44% (10.39%,20.19%) | -0.05% (-2.24%,2.09%) | -0.35% (-4.99%,4.04%) | 4.25% (-1.01%,9.21%)  |
| Hangzhou  | 29.9          | 1.8% (-7.80%,10.29%)                             | -2.38% (-12.95%,6.97%) | 33.82% (23.76%,42.43%) | -0.05% (-2.07%,1.94%) | -0.32% (-4.51%,3.64%) | 5.58% (-1.33%,12.00%) |
| Shaoxing  | 29.72         | 1.8% (-7.80%,10.30%)                             | -2.27% (-12.36%,6.68%) | 30.25% (21.11%,38.18%) | -0.05% (-2.24%,2.07%) | -0.35% (-4.89%,3.94%) | 5.42% (-1.29%,11.65%) |
| Ningbo    | 29.71         | 1.46% (-6.29%,8.42%)                             | -1.84% (-9.91%,5.46%)  | 30.62% (21.42%,38.59%) | -0.05% (-2.30%,2.14%) | -0.40% (-5.71%,4.58%) | 5.13% (-1.22%,11.06%) |
| Jinhua    | 29.12         | 1.48% (-6.35%,8.54%)                             | -1.84% (-9.88%,5.45%)  | 30.90% (21.60%,38.94%) | -0.06% (-2.60%,2.40%) | -0.31% (-4.38%,3.54%) | 5.28% (-1.26%,11.36%) |
| Yueyang   | 29.07         | 2.00% (-8.71%,11.47%)                            | -2.45% (-13.35%,7.22%) | 25.75% (17.82%,32.77%) | -0.05% (-2.43%,2.26%) | -0.34% (-4.85%,3.91%) | 6.72% (-1.62%,14.35%) |
| Shangrao  | 28.78         | 1.42% (-6.07%,8.27%)                             | -1.95% (-10.53%,5.80%) | 21.06% (14.42%,27.08%) | -0.17% (-8.07%,6.86%) | -0.43% (-6.08%,4.86%) | 4.93% (-1.17%,10.62%) |
| Taizhou   | 28.78         | 1.25% (-5.32%,7.27%)                             | -1.75% (-9.40%,5.22%)  | 20.40% (13.93%,26.30%) | -0.03% (-1.42%,1.33%) | -0.42% (-6.00%,4.81%) | 4.17% (-0.99%,9.04%)  |
| Nanchang  | 28.65         | 1.57% (-6.80%,9.08%)                             | -2.34% (-12.75%,6.86%) | 27.82% (19.37%,35.23%) | -0.06% (-2.81%,2.57%) | -0.36% (-5.02%,4.04%) | 6.37% (-1.53%,13.61%) |
| Yingtian  | 28.24         | 1.52% (-6.55%,8.78%)                             | -1.76% (-9.45%,5.24%)  | 20.29% (13.85%,26.15%) | -0.14% (-6.38%,5.57%) | -0.41% (-5.86%,4.68%) | 4.21% (-1.00%,9.12%)  |
| Changsha  | 28.23         | 2.34% (-10.40%,13.16%)                           | -2.14% (-11.61%,6.31%) | 29.15% (20.33%,36.84%) | -0.05% (-2.09%,1.94%) | -0.32% (-4.59%,3.70%) | 6.22% (-1.49%,13.32%) |
| Lishui    | 28.2          | 1.13% (-4.79%,6.60%)                             | -1.46% (-7.78%,4.39%)  | 22.63% (15.49%,29.08%) | -0.04% (-1.58%,1.49%) | -0.33% (-4.58%,3.71%) | 5.04% (-1.20%,10.87%) |
| Loudi     | 27.74         | 1.74% (-7.55%,9.99%)                             | -2.44% (-13.34%,7.12%) | 20.52% (14.02%,26.43%) | -0.06% (-2.85%,2.61%) | -0.40% (-5.60%,4.51%) | 7.69% (-1.87%,16.25%) |
| Huaihua   | 27.56         | 1.61% (-6.99%,9.28%)                             | -2.33% (-12.65%,6.84%) | 16.47% (11.17%,21.38%) | -0.06% (-2.82%,2.58%) | -0.38% (-5.36%,4.33%) | 6.02% (-1.44%,12.91%) |
| Zhuzhou   | 27.12         | 2.21% (-9.80%,12.44%)                            | -2.55% (-14.01%,7.41%) | 29.54% (20.61%,37.31%) | -0.08% (-3.48%,3.17%) | -0.33% (-4.66%,3.75%) | 5.65% (-1.35%,12.13%) |
| Jian      | 26.98         | 1.54% (-6.62%,8.93%)                             | -2.03% (-10.97%,6.04%) | 18.56% (12.64%,23.98%) | -0.11% (-5.09%,4.57%) | -0.41% (-5.82%,4.66%) | 5.11% (-1.22%,11.00%) |
| Shaoyang  | 26.92         | 2.12% (-9.34%,11.95%)                            | -2.35% (-12.87%,6.89%) | 21.43% (14.70%,27.53%) | -0.11% (-5.28%,4.71%) | -0.41% (-5.79%,4.65%) | 5.83% (-1.40%,12.5%)  |
| Guiyang   | 26.84         | 1.32% (-5.61%,7.68%)                             | -1.78% (-9.51%,5.30%)  | 19.99% (13.61%,25.83%) | -0.08% (-3.85%,3.48%) | -0.36% (-5.13%,4.14%) | 4.59% (-1.09%,9.94%)  |
| Fuzhou    | 26.06         | 0.98% (-4.14%,5.79%)                             | -1.46% (-7.74%,4.38%)  | 21.97% (15.03%,28.25%) | -0.03% (-1.39%,1.31%) | -0.42% (-5.88%,4.72%) | 4.35% (-1.03%,9.43%)  |
| Chenzhou  | 25.82         | 1.20% (-5.14%,6.99%)                             | -1.65% (-8.87%,4.93%)  | 20.26% (13.83%,26.13%) | -0.06% (-2.80%,2.58%) | -0.35% (-4.92%,3.96%) | 5.83% (-1.40%,12.49%) |
| Yongzhou  | 25.78         | 1.56% (-6.79%,8.98%)                             | -1.87% (-10.10%,5.52%) | 21.19% (14.51%,27.24%) | -0.05% (-2.39%,2.21%) | -0.39% (-5.55%,4.47%) | 4.32% (-1.03%,9.36%)  |
| Ganzhou   | 25.71         | 1.39% (-5.94%,8.04%)                             | -1.84% (-9.90%,5.44%)  | 19.47% (13.30%,25.09%) | -0.09% (-4.23%,3.81%) | -0.40% (-5.65%,4.53%) | 8.37% (-2.04%,17.66%) |
| Kunming   | 25.39         | 1.07% (-4.53%,6.32%)                             | -1.62% (-8.59%,4.85%)  | 24.50% (16.80%,31.44%) | -0.08% (-3.41%,3.14%) | -0.43% (-6.08%,4.88%) | 5.39% (-1.29%,11.59%) |
| Quanzhou  | 25.21         | 0.99% (-4.16%,5.81%)                             | -1.49% (-7.91%,4.47%)  | 19.71% (13.41%,25.49%) | -0.05% (-2.42%,2.24%) | -0.45% (-6.40%,5.12%) | 3.77% (-0.89%,8.21%)  |
| Shaoguan  | 24.83         | 1.20% (-5.11%,6.99%)                             | -1.43% (-7.62%,4.30%)  | 21.40% (14.63%,27.54%) | -0.08% (-3.43%,3.15%) | -0.37% (-5.26%,4.22%) | 6.19% (-1.49%,13.26%) |
| Qingyuan  | 24.32         | 1.46% (-6.32%,8.46%)                             | -1.87% (-10.07%,5.53%) | 29.65% (20.74%,37.37%) | -0.06% (-2.80%,2.59%) | -0.38% (-5.39%,4.32%) | 6.11% (-1.47%,13.07%) |
| Heyuan    | 24.05         | 1.05% (-4.43%,6.15%)                             | -1.36% (-7.22%,4.10%)  | 18.60% (12.65%,24.08%) | -0.04% (-1.93%,1.81%) | -0.39% (-5.57%,4.48%) | 5.68% (-1.36%,12.21%) |
| Zhaoqing  | 23.54         | 1.26% (-5.37%,7.30%)                             | -1.58% (-8.45%,4.73%)  | 25.36% (17.59%,32.21%) | -0.06% (-2.88%,2.66%) | -0.43% (-6.07%,4.84%) | 5.37% (-1.28%,11.55%) |
| Guangzhou | 23.37         | 1.25% (-5.34%,7.28%)                             | -1.71% (-9.15%,5.09%)  | 34.68% (24.55%,43.24%) | -0.05% (-2.17%,2.02%) | -0.40% (-5.63%,4.50%) | 5.69% (-1.36%,12.21%) |
| Huizhou   | 23.25         | 1.01% (-4.27%,5.95%)                             | -1.46% (-7.74%,4.38%)  | 19.95% (13.60%,25.76%) | -0.04% (-2.02%,1.88%) | -0.42% (-5.92%,4.75%) | 4.7% (-1.12%,10.16%)  |
| Nanning   | 23.05         | 1.35% (-5.79%,7.87%)                             | -1.89% (-10.15%,5.61%) | 26.33% (18.24%,33.49%) | -0.06% (-2.71%,2.50%) | -0.34% (-4.77%,3.86%) | 5.88% (-1.41%,12.61%) |
| Shanwei   | 23.03         | 0.74% (-3.12%,4.42%)                             | -1.05% (-5.54%,3.20%)  | 8.83% (5.88%,11.67%)   | -0.04% (-1.91%,1.79%) | -0.44% (-6.26%,5.01%) | 4.35% (-1.03%,9.43%)  |
| Foshan    | 23.02         | 1.29% (-5.49%,7.50%)                             | -1.89% (-10.19%,5.61%) | 32.06% (22.58%,40.17%) | -0.06% (-2.64%,2.44%) | -0.39% (-5.47%,4.36%) | 5.68% (-1.36%,12.19%) |
| Dongguan  | 22.95         | 1.35% (-5.78%,7.87%)                             | -1.64% (-8.77%,4.91%)  | 29.64% (20.73%,37.37%) | -0.06% (-2.62%,2.43%) | -0.47% (-6.70%,5.31%) | 5.16% (-1.23%,11.13%) |
| Shenzhen  | 22.66         | 0.93% (-3.91%,5.46%)                             | -1.30% (-6.87%,3.90%)  | 21.67% (14.85%,27.85%) | -0.03% (-1.40%,1.32%) | -0.41% (-5.87%,4.71%) | 4.18% (-0.99%,9.06%)  |
| Zhongshan | 22.52         | 1.20% (-5.12%,6.96%)                             | -1.46% (-7.76%,4.36%)  | 26.89% (18.88%,33.79%) | -0.04% (-1.96%,1.83%) | -0.35% (-4.96%,3.98%) | 5.46% (-1.31%,11.71%) |
| Jiangmen  | 22.28         | 1.13% (-4.80%,6.57%)                             | -1.62% (-8.69%,4.84%)  | 25.46% (17.75%,32.20%) | -0.05% (-2.09%,1.95%) | -0.39% (-5.61%,4.46%) | 5.29% (-1.27%,11.37%) |
| Zhuhai    | 22.17         | 0.91% (-3.85%,5.34%)                             | -1.21% (-6.44%,3.65%)  | 22.51% (15.55%,28.70%) | -0.03% (-1.50%,1.40%) | -0.40% (-5.73%,4.59%) | 4.33% (-1.03%,9.38%)  |
| Yangjiang | 22.04         | 1.15% (-4.90%,6.68%)                             | -1.37% (-7.26%,4.11%)  | 15.26% (10.36%,19.80%) | -0.04% (-1.79%,1.67%) | -0.41% (-5.86%,4.69%) | 5.60% (-1.34%,12.04%) |

Note: PM, particulate matter; SO<sub>2</sub>, sulfur dioxide; NO<sub>2</sub>, nitrogen dioxide; O<sub>3</sub>, ozone; CO, carbon monoxide.

**Table S11.** Heterogeneity of the air pollutant effects on influenza incidence across the 82 Chinese cities and how much heterogeneity remains after city-specific characteristics are accounted for, based on the second-stage random effect meta-regression following the first-stage single-pollutant models.

|                               | I <sup>2</sup>          | Q test* | Wald test† | I <sup>2</sup>        | Q test* | Wald test† |
|-------------------------------|-------------------------|---------|------------|-----------------------|---------|------------|
|                               | <b>PM<sub>2.5</sub></b> |         |            | <b>NO<sub>2</sub></b> |         |            |
| Intercept-only                | 83.549                  | <.001   |            | 88.604                | <.001   |            |
| PWD-G                         | 83.676                  | <.001   | 0.945      | 88.194                | <.001   | 0.039      |
| Median level of air pollution | 80.340                  | <.001   | 0.067      | 85.697                | <.001   | <.001      |
| Children proportion           | 82.004                  | <.001   | 0.021      | 88.706                | <.001   | 0.892      |
| Longitude                     | 83.294                  | <.001   | 0.859      | 88.366                | <.001   | 0.288      |
| Latitude                      | 80.239                  | <.001   | 0.015      | 88.126                | <.001   | <.001      |
|                               | <b>PM<sub>10</sub></b>  |         |            | <b>O<sub>3</sub></b>  |         |            |
| Intercept-only                | 83.841                  | <.001   |            | 63.931                | <.001   |            |
| PWD-G                         | 83.709                  | <.001   | 0.948      | 63.057                | <.001   | 0.180      |
| Median level of air pollution | 80.177                  | <.001   | 0.002      | 61.562                | <.001   | 0.002      |
| Children proportion           | 82.119                  | <.001   | 0.020      | 64.197                | <.001   | 0.865      |
| Longitude                     | 83.932                  | <.001   | 0.954      | 55.266                | <.001   | 0.002      |
| Latitude                      | 78.134                  | <.001   | <.001      | 63.243                | <.001   | 0.668      |
|                               | <b>SO<sub>2</sub></b>   |         |            | <b>CO</b>             |         |            |
| Intercept-only                | 72.942                  | <.001   |            | 86.088                | <.001   |            |
| PWD-G                         | 72.123                  | <.001   | 0.691      | 86.147                | <.001   | 0.636      |
| Median level of air pollution | 69.891                  | <.001   | 0.003      | 85.220                | <.001   | 0.041      |
| Children proportion           | 71.276                  | <.001   | 0.033      | 84.844                | <.001   | 0.366      |
| Longitude                     | 73.276                  | <.001   | 0.034      | 85.979                | <.001   | 0.836      |
| Latitude                      | 67.962                  | <.001   | <.001      | 80.721                | <.001   | <.001      |

\*p-value derived from the Cochran's Q test.

†p-value derived from the Wald test.

**Table S12.** Median (IQR) of Bayesian information criterion (BIC) values for the linear and nonlinear air pollutant effect models across the 82 Chinese cities.

|                   | <b>Linear</b>             | <b>Nonlinear</b>          | <b>p-value*</b> |
|-------------------|---------------------------|---------------------------|-----------------|
| PM <sub>2.5</sub> | 13789.1 (11123.1–39144.4) | 13929 (11168.6–28629.5)   | 0.778           |
| PM <sub>10</sub>  | 13761.3 (11121.6–41237.2) | 13852.7 (11177.5–29794)   | 0.387           |
| SO <sub>2</sub>   | 13813.6 (11073.7–33865.8) | 13750.1 (11160–31507.9)   | 0.871           |
| NO <sub>2</sub>   | 13859 (11123.5–40859.4)   | 13973.1 (11175.9–30136.9) | 0.647           |
| O <sub>3</sub>    | 14531 (11172.6–42803.7)   | 14013.5 (11274.9–37752.3) | 0.523           |
| CO                | 13794.2 (11125.5–42931.8) | 13914.3 (11153.3–30560.7) | 0.810           |

\*p-values were derived from the paired Wilcoxon rank-sum test.

Note: PM, particulate matter; SO<sub>2</sub>, sulfur dioxide; NO<sub>2</sub>, nitrogen dioxide; O<sub>3</sub>, ozone; CO, carbon monoxide.

**Table S13.** Pooled estimates (95% CI) of cumulative risk ratios (CRR) per 10 $\mu\text{g}/\text{m}^3$  increase in daily concentrations of the six air pollutants over the lags of 1–7 days in the sensitivity analyses.

| Conditions                                                 | PM <sub>2.5</sub>   | PM <sub>10</sub>    | NO <sub>2</sub>     | SO <sub>2</sub>     | O <sub>3</sub>        | CO                   |
|------------------------------------------------------------|---------------------|---------------------|---------------------|---------------------|-----------------------|----------------------|
| <b>Single-pollutant model</b>                              |                     |                     |                     |                     |                       |                      |
| Origin model (>500 cases per year; 82 cities)              | 1.024 (1.014–1.033) | 1.017 (1.010–1.023) | 1.093 (1.067–1.119) | 1.094 (1.054–1.136) | 1.007 (0.9996–1.014)  | 1.003 (1.002–1.004)  |
| Cities with >400 cases per year (103 cities)               | 1.021 (1.012–1.029) | 1.013 (1.008–1.019) | 1.091 (1.067–1.115) | 1.081 (1.046–1.117) | 1.006 (0.999–1.012)   | 1.003 (1.002–1.003)  |
| Cities with >300 cases per year (130 cities)               | 1.020 (1.012–1.029) | 1.014 (1.008–1.019) | 1.091 (1.070–1.112) | 1.097 (1.058–1.137) | 1.004 (0.998–1.010)   | 1.003 (1.002–1.004)  |
| Change temperature and humidity df to 4                    | 1.020 (1.012–1.028) | 1.013 (1.008–1.019) | 1.088 (1.065–1.111) | 1.081 (1.046–1.118) | 1.007 (0.9995–1.014)  | 1.003 (1.002–1.003)  |
| Change temperature and humidity df to 5                    | 1.020 (1.012–1.028) | 1.013 (1.007–1.019) | 1.088 (1.066–1.111) | 1.080 (1.046–1.114) | 1.008 (1.001–1.015)   | 1.003 (1.002–1.003)  |
| Change the moving-averaged lag days of tem and rhu to 10   | 1.028 (1.019–1.037) | 1.019 (1.013–1.026) | 1.096 (1.071–1.121) | 1.111 (1.065–1.159) | 1.006 (1.00001–1.013) | 1.003 (1.002–1.004)  |
| Change the moving-averaged lag days of tem and rhu to 14   | 1.029 (1.020–1.038) | 1.019 (1.013–1.026) | 1.094 (1.070–1.118) | 1.104 (1.061–1.149) | 1.006 (1.001–1.012)   | 1.003 (1.002–1.004)  |
| Use serial intervals(3–5days) instead of incubation period | 1.025 (1.016–1.034) | 1.018 (1.012–1.025) | 1.098 (1.073–1.124) | 1.117 (1.073–1.163) | 1.005 (0.997–1.012)   | 1.003 (1.002–1.004)  |
| <b>Multi-pollutant model</b>                               |                     |                     |                     |                     |                       |                      |
| Origin model (>500 cases per year; 82 cities)              | 1.004 (0.985–1.022) | 0.997 (0.985–1.009) | 1.089 (1.057–1.122) | 1.000 (0.977–1.023) | 1.000 (0.993–1.006)   | 1.001 (0.9999–1.001) |
| Cities with >400 cases per year (103 cities)               | 1.009 (0.992–1.028) | 0.989 (0.977–1.001) | 1.097 (1.066–1.130) | 1.000 (0.980–1.021) | 1.001 (0.995–1.008)   | 1.000 (0.9998–1.001) |
| Cities with >300 cases per year (130 cities)               | 1.009 (0.992–1.027) | 0.987 (0.976–0.997) | 1.091 (1.065–1.118) | 1.003 (0.977–1.029) | 1.000 (0.993–1.006)   | 1.001 (1.001–1.002)  |
| Change temperature and humidity df to 4                    | 1.007 (0.990–1.024) | 0.992 (0.981–1.003) | 1.091 (1.061–1.122) | 1.004 (0.984–1.023) | 1.002 (0.996–1.008)   | 1.000 (0.9998–1.001) |
| Change temperature and humidity df to 5                    | 1.006 (0.990–1.022) | 0.992 (0.981–1.002) | 1.094 (1.064–1.125) | 1.003 (0.983–1.023) | 1.003 (0.997–1.009)   | 1.000 (0.9998–1.001) |
| Change the moving-averaged lag days of tem and rhu to 10   | 1.008 (0.992–1.025) | 0.995 (0.984–1.007) | 1.091 (1.061–1.122) | 1.000 (0.978–1.023) | 0.998 (0.993–1.004)   | 1.001 (0.9999–1.001) |
| Change the moving-averaged lag days of tem and rhu to 14   | 1.006 (0.992–1.020) | 0.998 (0.989–1.008) | 1.091 (1.061–1.122) | 0.996 (0.975–1.018) | 0.997 (0.992–1.001)   | 1.001 (1.0001–1.002) |
| Use serial intervals(3–5days) instead of incubation period | 0.999 (0.979–1.018) | 1.000 (0.987–1.013) | 1.091 (1.059–1.123) | 1.006 (0.980–1.032) | 0.997 (0.989–1.012)   | 1.001 (0.9998–1.002) |

Note: PM, particulate matter; SO<sub>2</sub>, sulfur dioxide; NO<sub>2</sub>, nitrogen dioxide; O<sub>3</sub>, ozone; CO, carbon monoxide.

## Figures

**Figure S1.** Time series of daily influenza incidence and air pollutant level averaged over 2015–2019. The red lines represented the median of daily influenza incidence and concentrations of air pollutants and the black lines (top and bottom) represented the IQR (25%, 75%) across the 82 selected cities. Note: PM, particulate matter; SO<sub>2</sub>, sulfur dioxide; NO<sub>2</sub>, nitrogen dioxide; O<sub>3</sub>, ozone; CO, carbon monoxide. Numeric data can be found in Excel Table S1.

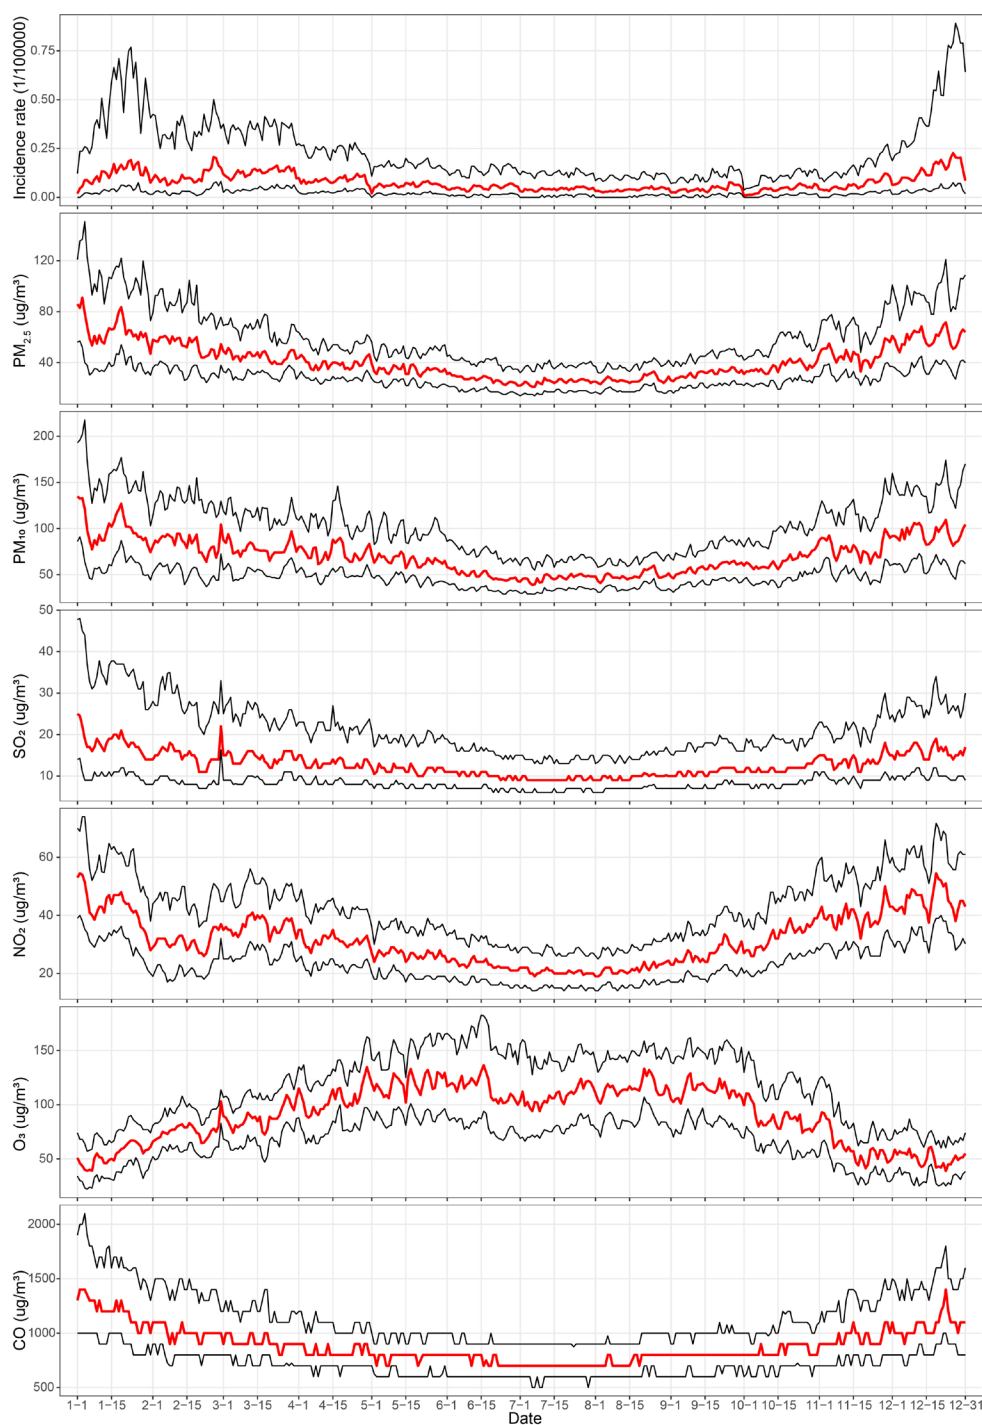

Figure S2. Distribution of daily incidence (A) and distribution of variance/mean ratio for daily counts of influenza cases (B) in the 82 Chinese cities.

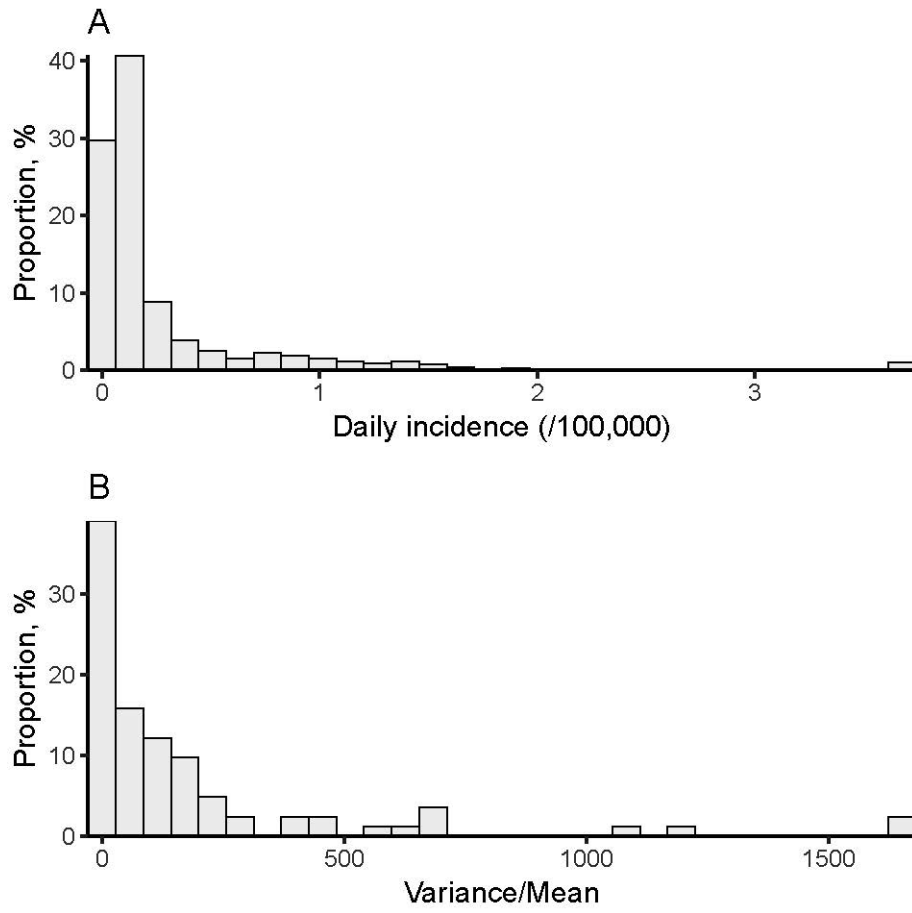



Figure S3. Spatial distribution of city-level annual influenza incidence among (A) children (0–14 years old) and (B) adults ( $\geq 15$  years old) in the mainland of China from 2015 to 2019.

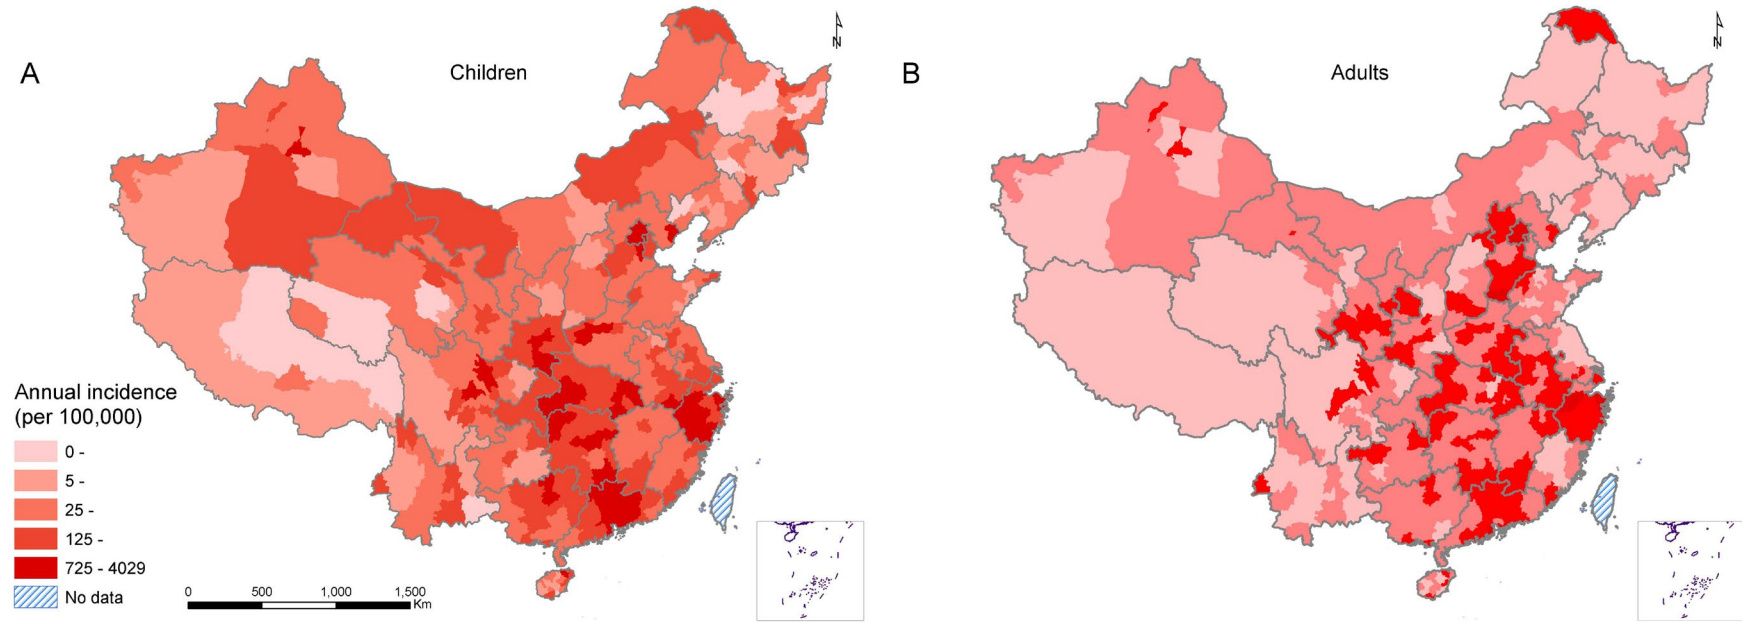

**Figure S4.** Annual median concentrations of air pollutants in the 82 Chinese cities selected for the primary analysis. Note: PM, particulate matter; SO<sub>2</sub>, sulfur dioxide; NO<sub>2</sub>, nitrogen dioxide; O<sub>3</sub>, ozone; CO, carbon monoxide. Numeric data can be found in Tables S2–S4.

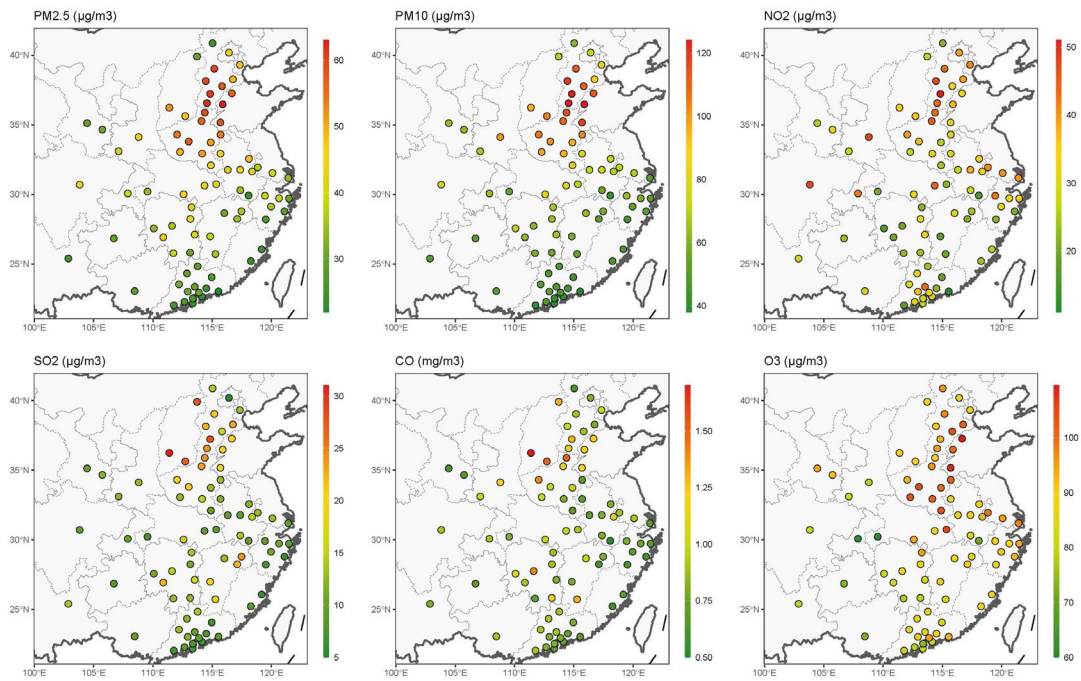

**Figure S5.** Pooled estimates of lag-specific risk ratios and 95% confidence intervals per  $10\mu\text{g}/\text{m}^3$  increase in the concentration of each air pollutant based on the single-pollutant models. Natural cubic spline with 3 degrees of freedom was used to model the variation of the linear effect over the lags. Note: PM, particulate matter;  $\text{SO}_2$ , sulfur dioxide;  $\text{NO}_2$ , nitrogen dioxide;  $\text{O}_3$ , ozone; CO, carbon monoxide. Numeric data can be found in Table S8.

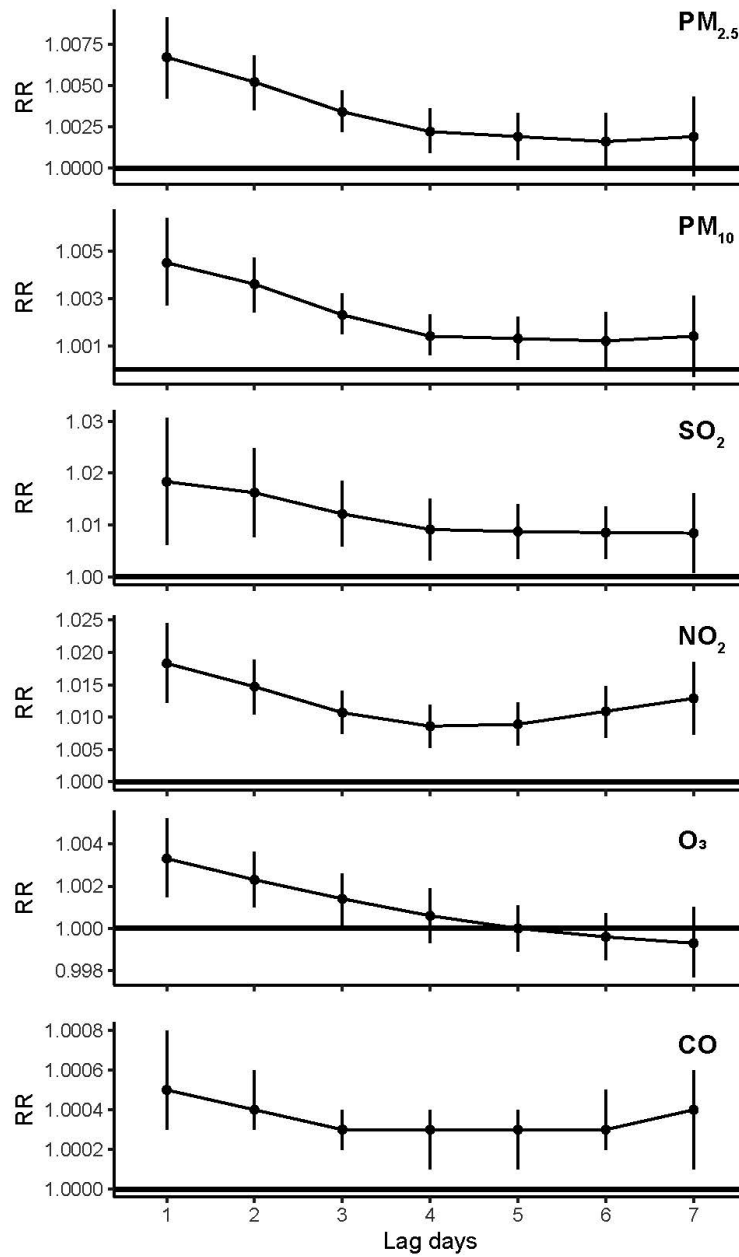

Figure S6. Forest plots for the attributable fractions (and 95% confidence intervals) of influenza incidence associated with air pollutant concentrations, using single-pollutant models. The cities were ordered by latitude from high to low (from northern to southern Chinese cities). Note: PM, particulate matter; SO<sub>2</sub>, sulfur dioxide; NO<sub>2</sub>, nitrogen dioxide; O<sub>3</sub>, ozone; CO, carbon monoxide. Numeric data can be found in Table S9.

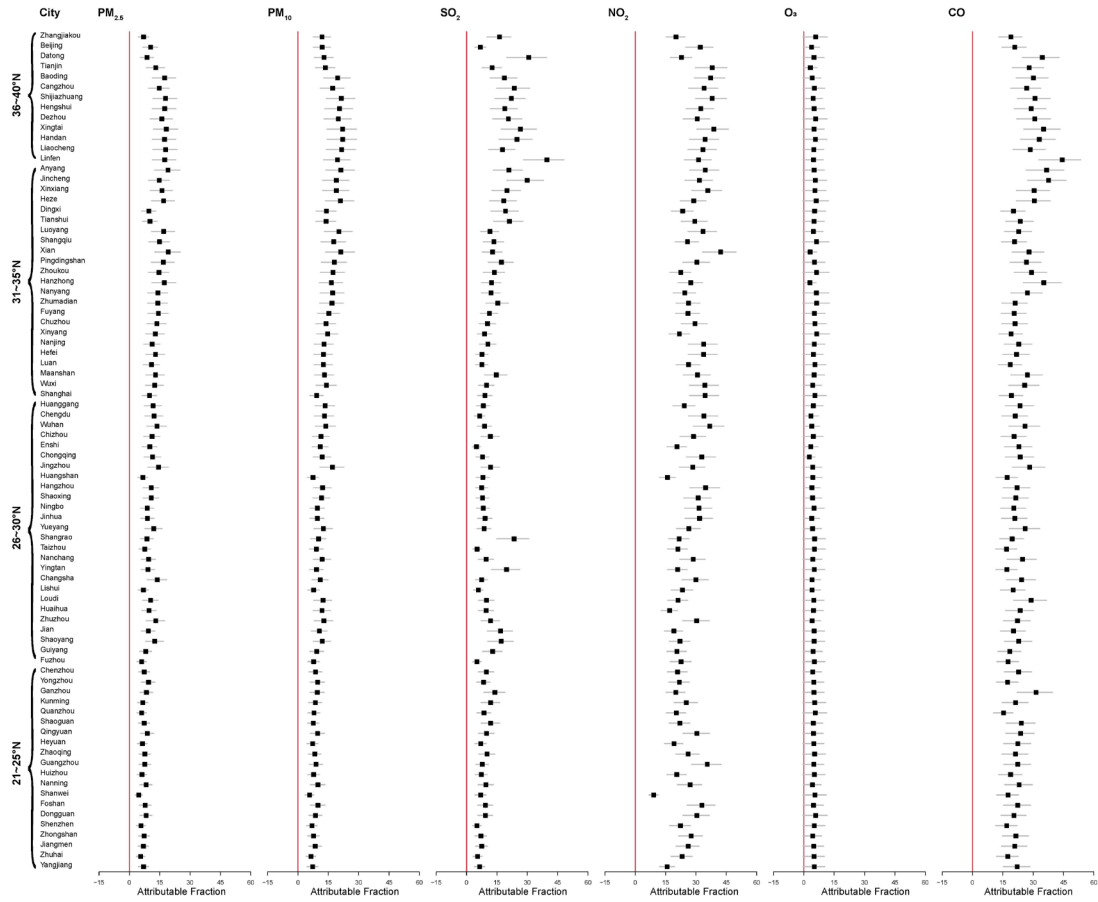

Figure S7. Forest plots for the attributable fractions (and 95% confidence intervals) of influenza incidence associated with air pollutant concentrations, using the multi-pollutant model. The cities were ordered by latitude from high to low (from northern to southern Chinese cities). Note: PM, particulate matter; SO<sub>2</sub>, sulfur dioxide; NO<sub>2</sub>, nitrogen dioxide; O<sub>3</sub>, ozone; CO, carbon monoxide. Numeric data can be found in Table S10.

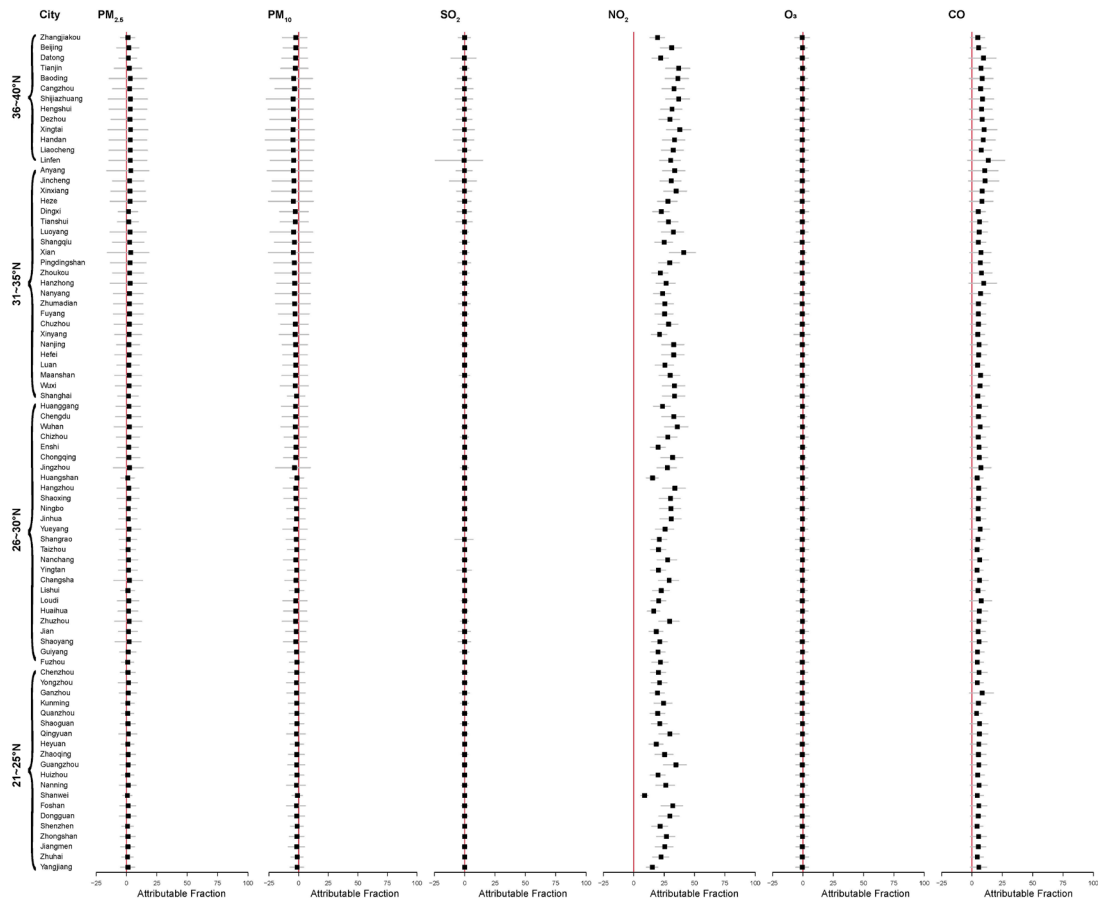

Figure S8. Correlation between daily concentrations of the six air pollutants during 2015–2019 in the 82 Chinese cities. Note: PM, particulate matter; SO<sub>2</sub>, sulfur dioxide; NO<sub>2</sub>, nitrogen dioxide; O<sub>3</sub>, ozone; CO, carbon monoxide.

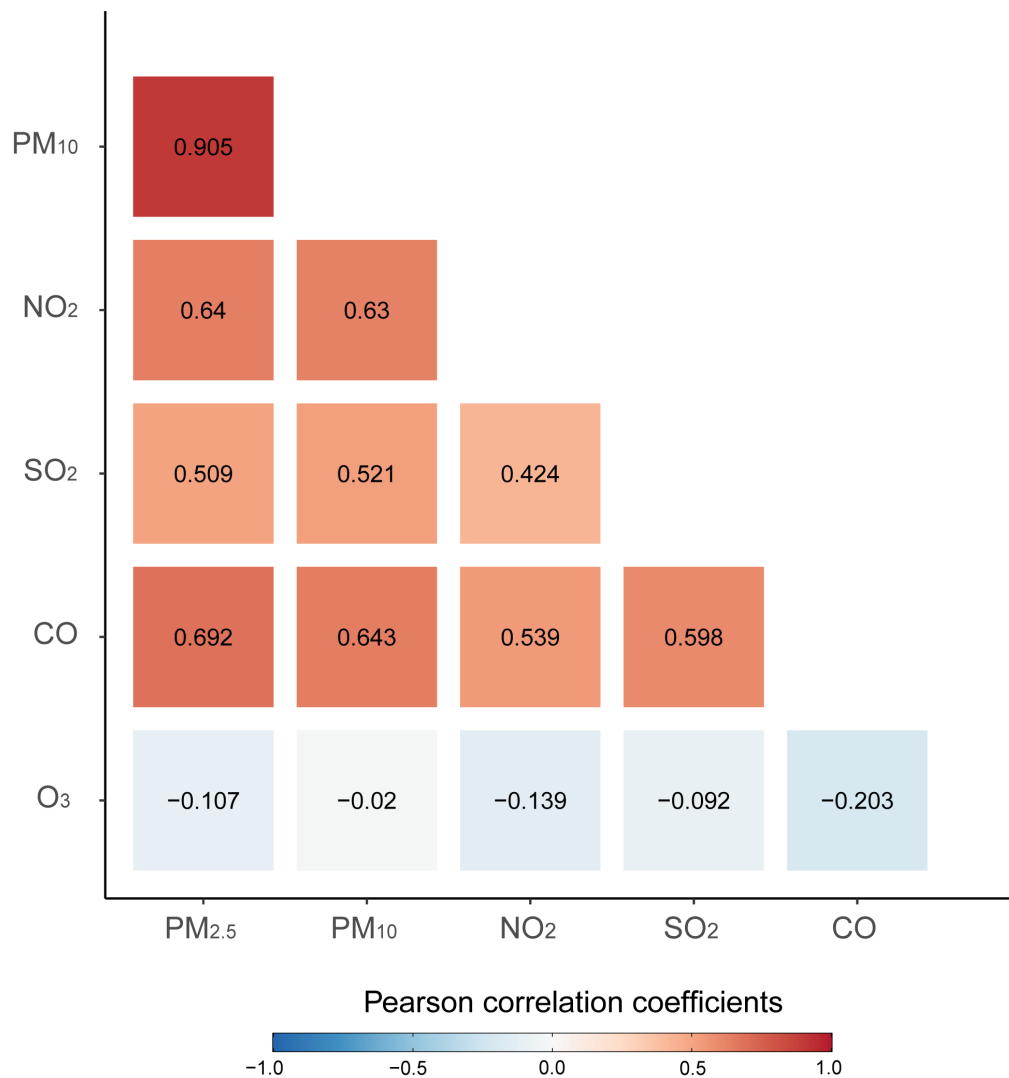

Supplement: ehp12146.s001.acco.pdf [file ehp12146.s001.acco.pdf]
